# Supplementary material
Source: PubMed Central journal article supplement (PMC4309707)
Supplement: AEM.03682-14_zam999116019so1.pdf [file AEM.03682-14_zam999116019so1.pdf]

1 **Metatranscriptomic analyses of plant cell wall polysaccharide degradation by microorganisms in**  
2 **cow rumen**

3 Xin Dai<sup>1†</sup>, Yan Tian<sup>2,7†</sup>, Jinting Li<sup>1†</sup>, Xiaoyun Su<sup>1†</sup>, Xuewei Wang<sup>3</sup>, Shengguo Zhao<sup>4</sup>, Li Liu<sup>5</sup>, Yingfeng  
4 Luo<sup>2</sup>, Di Liu<sup>5</sup>, Huajun Zheng<sup>6</sup>, Jiaqi Wang<sup>4</sup>, Zhiyang Dong<sup>1</sup>, Songnian Hu<sup>2\*</sup>, Li Huang<sup>1\*</sup>

5

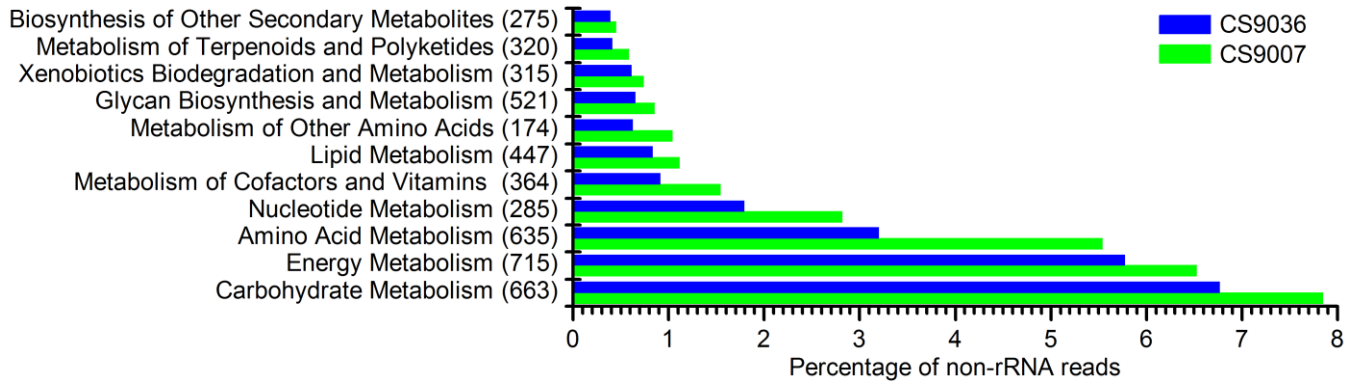

6

7 **Fig S1.** The profiling of KEGG metabolic pathways in the two rumen metatranscriptomes. The number  
8 inside parenthesis is the total number of KEGG Ortholog (KO) in the pathway in KEGG database.

9

10

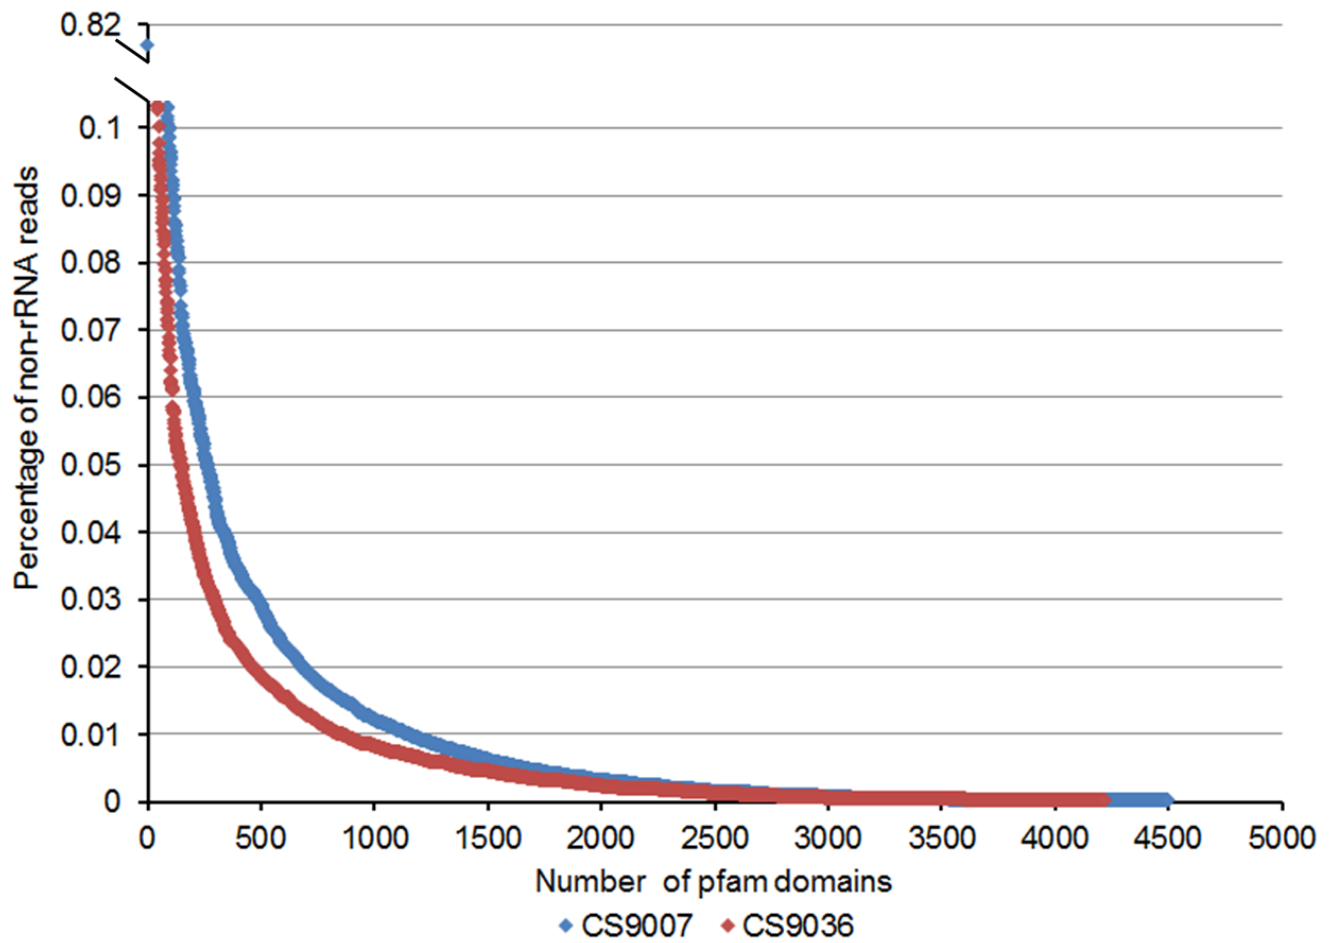

11

12 **Fig S2.** The expression abundance of the detected protein domains based on Pfam.

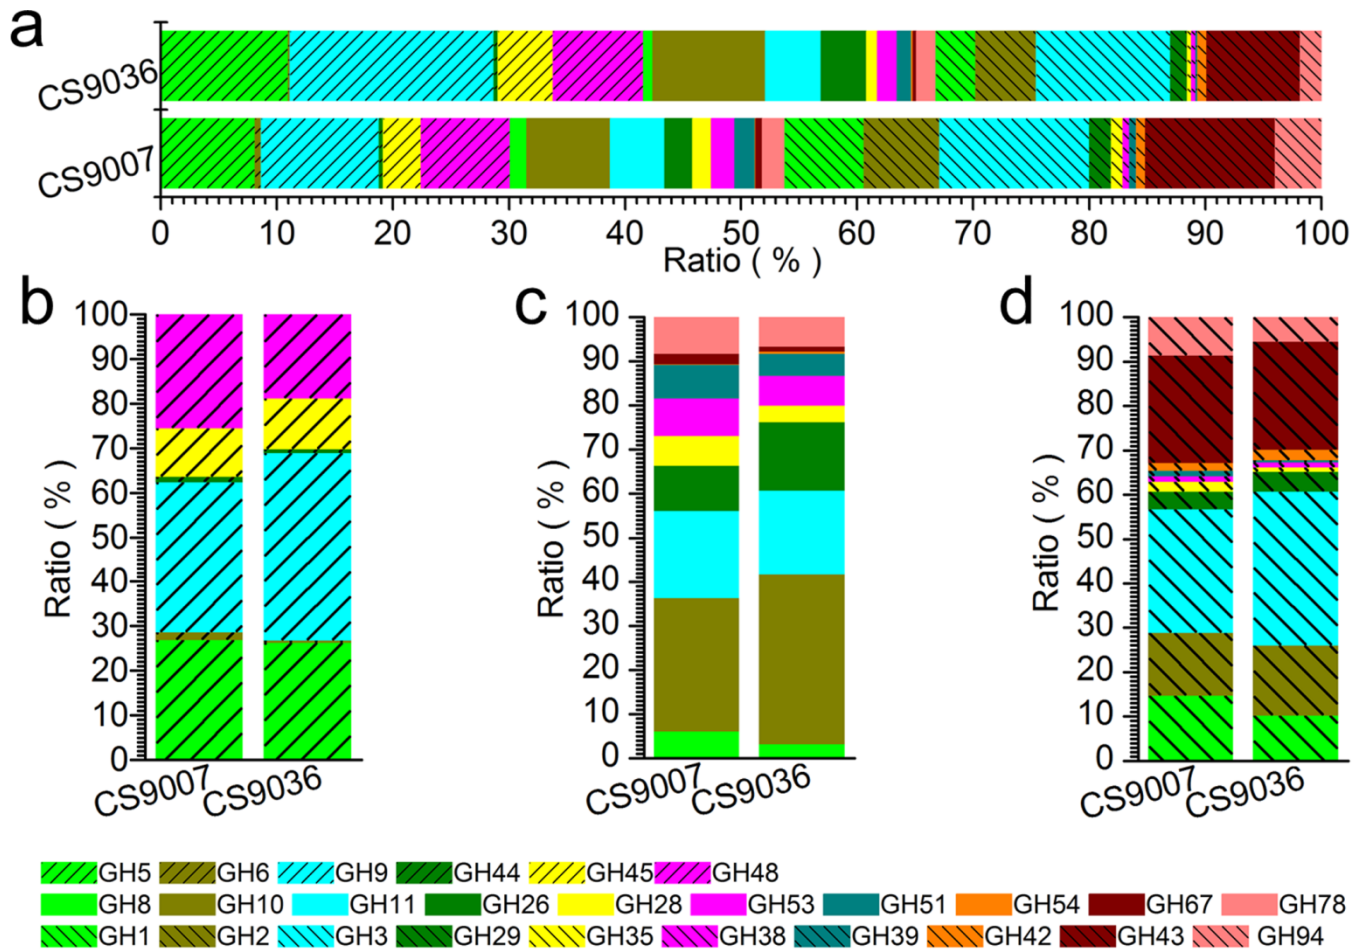

13

14 **Fig S3.** Average relative ratio (%) of PCWP-degradation related GHs from CS9007 and CS9036. a: GHs  
 15 targeted to PCWP-degrading; b: GHs targeted to cellulose-degrading; c: GHs targeted to  
 16 hemicellulose-degrading; d: GHs targeted to oligosaccharide-degrading.

17

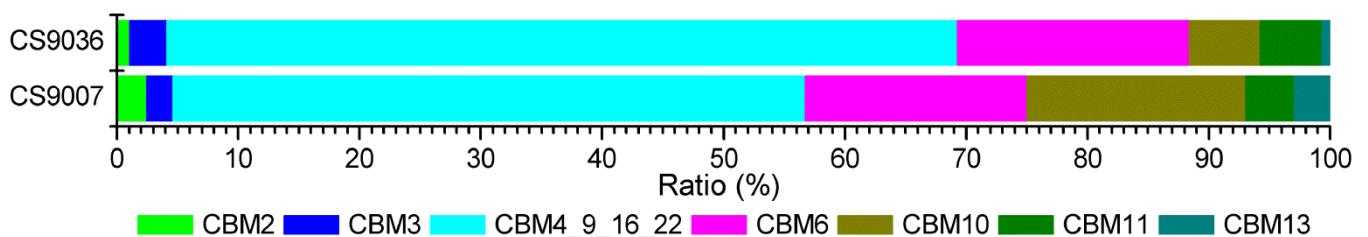

18

19 **Fig S4.** Average relative ratio (%) of PCWP-degradation related CBMs from CS9007 and CS9036.

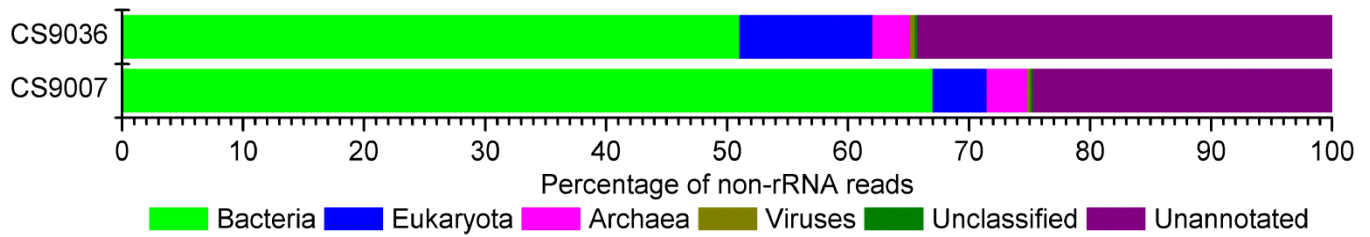

20

21 **Fig S5.** Taxonomic distribution, at domain level, of the non-rRNA reads derived from the cow rumen  
 22 metatranscriptomes.

23

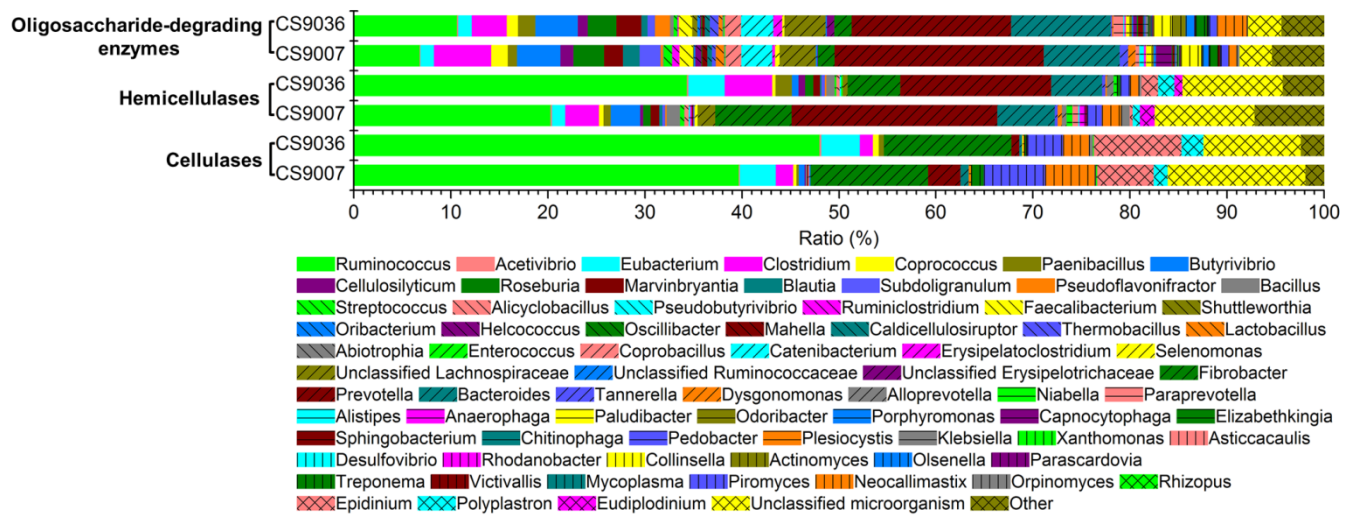

24

25 **Fig S6.** Relative ratio (%) of PCWP degradation related genera from CS9007 and CS9036. The relative  
 26 ratio is defined as the proportion of the number of sequence reads for a given genus to that for the total  
 27 genera encoding cellulase-, hemicellulase- and oligosaccharide-degrading enzymes, respectively.

28 "Other" represents the genera only detected in CS9007 or CS9036.

29

30 **Table S1.** Summary of non-rRNAs assigned to NR, KEGG, Pfam and CAZy databases.

| Characteristics                              | CS9007              | CS9036              |
|----------------------------------------------|---------------------|---------------------|
| No. of non-rRNA reads<br>match against       | 627,883             | 479,200             |
| NR ( $\leq 1e^{-5}$ )                        | 472,771 (75.30%)    | 315,139<br>(65.76%) |
| Identity $\geq 30\%$                         | 462,413 (97.81%)    | 307,375<br>(97.54%) |
| Identity $< 30\%$                            | 10,358 (2.19%)      | 7,764 (2.46%)       |
| KEGG ( $\leq 1e^{-5}$ )                      | 431,183 (68.67%)    | 263,099<br>(54.90%) |
| Pfam ( $\leq 1e^{-5}$ )                      | 359,231(57.21%)     | 189727(39.59%)      |
| <b>Pfam (<math>\leq 1e^{-5}</math>)-CAZy</b> | <b>9744 (1.55%)</b> | <b>7338 (1.53%)</b> |

31

32 **Table S2.** The CAZy families [glycoside hydrolases (GHs), carbohydrate esterases (CEs), pectate lyases  
 33 (PLs), Glycosyl Transferases (GTs), carbohydrate-binding modules (CBMs)] and other domains  
 34 associated with PCWP-degrading and their abundance<sup>1</sup> detected in two metatranscriptomes

| CAZy Family          | Pfam Accession | Pfam HMM Name          | Number of reads |            | Abundance <sup>1</sup> (%) |               |               |
|----------------------|----------------|------------------------|-----------------|------------|----------------------------|---------------|---------------|
|                      |                |                        | CS9007          | CS9036     | CS9007                     | CS9036        | Average       |
| Glycoside hydrolases |                |                        |                 |            |                            |               |               |
| <b>GH1</b>           | <b>PF00232</b> | <b>Glyco_hydro_1</b>   | <b>190</b>      | <b>80</b>  | <b>0.0303</b>              | <b>0.0167</b> | <b>0.0235</b> |
| <b>GH2</b>           | <b>PF02836</b> | <b>Glyco_hydro_2_C</b> | <b>182</b>      | <b>123</b> | <b>0.029</b>               | <b>0.0257</b> | <b>0.0273</b> |
| <b>GH3</b>           | <b>PF00933</b> | <b>Glyco_hydro_3</b>   | <b>360</b>      | <b>271</b> | <b>0.0573</b>              | <b>0.0566</b> | <b>0.0569</b> |
| GH4                  | PF02056        | Glyco_hydro_4          | 30              | 18         | 0.0048                     | 0.0038        | 0.0043        |
| <b>GH5</b>           | <b>PF00150</b> | <b>Cellulase</b>       | <b>226</b>      | <b>257</b> | <b>0.036</b>               | <b>0.0536</b> | <b>0.0448</b> |
| <b>GH6</b>           | <b>PF01341</b> | <b>Glyco_hydro_6</b>   | <b>15</b>       | <b>4</b>   | <b>0.0024</b>              | <b>0.0008</b> | <b>0.0016</b> |
| <b>GH7</b>           | <b>PF00840</b> | <b>Glyco_hydro_7</b>   | <b>0</b>        | <b>0</b>   | <b>0</b>                   | <b>0</b>      | <b>0</b>      |
| <b>GH8</b>           | <b>PF01270</b> | <b>Glyco_hydro_8</b>   | <b>40</b>       | <b>19</b>  | <b>0.0064</b>              | <b>0.004</b>  | <b>0.0052</b> |
| <b>GH9</b>           | <b>PF00759</b> | <b>Glyco_hydro_9</b>   | <b>283</b>      | <b>412</b> | <b>0.0451</b>              | <b>0.086</b>  | <b>0.0655</b> |
| <b>GH10</b>          | <b>PF00331</b> | <b>Glyco_hydro_10</b>  | <b>200</b>      | <b>228</b> | <b>0.0319</b>              | <b>0.0476</b> | <b>0.0397</b> |
| <b>GH11</b>          | <b>PF00457</b> | <b>Glyco_hydro_11</b>  | <b>131</b>      | <b>112</b> | <b>0.0209</b>              | <b>0.0234</b> | <b>0.0221</b> |
| <b>GH12</b>          | <b>PF01670</b> | <b>Glyco_hydro_12</b>  | <b>0</b>        | <b>0</b>   | <b>0</b>                   | <b>0</b>      | <b>0</b>      |
| GH13                 | PF00128        | Alpha-amylase          | 1321            | 1146       | 0.2104                     | 0.2391        | 0.2248        |
| GH14                 | PF01373        | Glyco_hydro_14         | 1               | 3          | 0.0002                     | 0.0006        | 0.0004        |
| GH15                 | PF00723        | Glyco_hydro_15         | 1               | 0          | 0.0002                     | 0             | 0.0001        |
| GH16                 | PF00722        | Glyco_hydro_16         | 59              | 48         | 0.0094                     | 0.01          | 0.0097        |
| GH17                 | PF00332        | Glyco_hydro_17         | 2               | 0          | 0.0003                     | 0             | 0.0002        |
| GH18                 | PF00704        | Glyco_hydro_18         | 42              | 28         | 0.0067                     | 0.0058        | 0.0063        |
| GH19                 | PF00182        | Glyco_hydro_19         | 0               | 0          | 0                          | 0             | 0             |
| GH20                 | PF00728        | Glyco_hydro_20         | 63              | 29         | 0.01                       | 0.0061        | 0.008         |
| GH22                 | PF00062        | Lys                    | 0               | 0          | 0                          | 0             | 0             |
| GH23                 | PF01464        | SLT                    | 117             | 31         | 0.0186                     | 0.0065        | 0.0126        |
| GH24/GH104           | PF00959        | Phage_lysozyme         | 12              | 10         | 0.0019                     | 0.0021        | 0.002         |
| GH25                 | PF01183        | Glyco_hydro_25         | 120             | 92         | 0.0191                     | 0.0192        | 0.0192        |
| <b>GH26</b>          | <b>PF02156</b> | <b>Glyco_hydro_26</b>  | <b>67</b>       | <b>92</b>  | <b>0.0107</b>              | <b>0.0192</b> | <b>0.0149</b> |
| GH27                 | PF02065        | Melibiose              | 223             | 112        | 0.0355                     | 0.0234        | 0.0294        |
| <b>GH28</b>          | <b>PF00295</b> | <b>Glyco_hydro_28</b>  | <b>45</b>       | <b>22</b>  | <b>0.0072</b>              | <b>0.0046</b> | <b>0.0059</b> |
| <b>GH29</b>          | <b>PF01120</b> | <b>Alpha_L_fucos</b>   | <b>52</b>       | <b>34</b>  | <b>0.0083</b>              | <b>0.0071</b> | <b>0.0077</b> |
| GH30                 | PF02055        | Glyco_hydro_30         | 11              | 16         | 0.0018                     | 0.0033        | 0.0025        |
| GH31                 | PF01055        | Glyco_hydro_31         | 171             | 185        | 0.0272                     | 0.0386        | 0.0329        |
| GH32                 | PF00251        | Glyco_hydro_32N        | 184             | 113        | 0.0293                     | 0.0236        | 0.0264        |
| GH33                 | PF02973        | Sialidase              | 0               | 0          | 0                          | 0             | 0             |

|             |                |                                                        |            |            |               |               |               |
|-------------|----------------|--------------------------------------------------------|------------|------------|---------------|---------------|---------------|
| GH34        | PF00064        | Neur                                                   | 0          | 0          | 0             | 0             | 0             |
| <b>GH35</b> | <b>PF01301</b> | <b>Glyco_hydro_35</b>                                  | <b>28</b>  | <b>8</b>   | <b>0.0045</b> | <b>0.0017</b> | <b>0.0031</b> |
| GH36        | PF05691        | Raffinose_syn                                          | 5          | 0          | 0.0008        | 0             | 0.0004        |
| GH37        | PF01204        | Trehalase                                              | 2          | 1          | 0.0003        | 0.0002        | 0.0003        |
| <b>GH38</b> | <b>PF01074</b> | <b>Glyco_hydro_38</b>                                  | <b>16</b>  | <b>9</b>   | <b>0.0025</b> | <b>0.0019</b> | <b>0.0022</b> |
| <b>GH39</b> | <b>PF01229</b> | <b>Glyco_hydro_39</b>                                  | <b>16</b>  | <b>4</b>   | <b>0.0025</b> | <b>0.0008</b> | <b>0.0017</b> |
| <b>GH42</b> | <b>PF02449</b> | <b>Glyco_hydro_42</b>                                  | <b>22</b>  | <b>18</b>  | <b>0.0035</b> | <b>0.0038</b> | <b>0.0036</b> |
| <b>GH43</b> | <b>PF04616</b> | <b>Glyco_hydro_43</b>                                  | <b>312</b> | <b>189</b> | <b>0.0497</b> | <b>0.0394</b> | <b>0.0446</b> |
| <b>GH44</b> | <b>PF12891</b> | <b>Glyco_hydro_44</b>                                  | <b>10</b>  | <b>8</b>   | <b>0.0016</b> | <b>0.0017</b> | <b>0.0016</b> |
| <b>GH45</b> | <b>PF02015</b> | <b>Glyco_hydro_45</b>                                  | <b>91</b>  | <b>111</b> | <b>0.0145</b> | <b>0.0232</b> | <b>0.0188</b> |
| GH46        | PF01374        | Glyco_hydro_46                                         | 0          | 0          | 0             | 0             | 0             |
| GH47        | PF01532        | Glyco_hydro_47                                         | 0          | 0          | 0             | 0             | 0             |
| <b>GH48</b> | <b>PF02011</b> | <b>Glyco_hydro_48</b>                                  | <b>214</b> | <b>183</b> | <b>0.0341</b> | <b>0.0382</b> | <b>0.0361</b> |
| GH49        | PF03718        | Glyco_hydro_49                                         | 0          | 0          | 0             | 0             | 0             |
| <b>GH51</b> | <b>PF06964</b> | <b>Alpha-L-arabinofur<br/>anosidase<br/>C-terminus</b> | <b>50</b>  | <b>29</b>  | <b>0.008</b>  | <b>0.0061</b> | <b>0.007</b>  |
| <b>GH52</b> | <b>PF03512</b> | <b>Glyco_hydro_52</b>                                  | <b>0</b>   | <b>0</b>   | <b>0</b>      | <b>0</b>      | <b>0</b>      |
| <b>GH53</b> | <b>PF07745</b> | <b>Glyco_hydro_53</b>                                  | <b>56</b>  | <b>40</b>  | <b>0.0089</b> | <b>0.0083</b> | <b>0.0086</b> |
| <b>GH54</b> | <b>PF09206</b> | <b>ArabFuran-catal</b>                                 | <b>1</b>   | <b>3</b>   | <b>0.0002</b> | <b>0.0006</b> | <b>0.0004</b> |
| GH56        | PF01630        | Glyco_hydro_56                                         | 0          | 0          | 0             | 0             | 0             |
| GH57        | PF03065        | Glyco_hydro_57                                         | 54         | 39         | 0.0086        | 0.0081        | 0.0084        |
| GH59        | PF02057        | Glyco_hydro_59                                         | 1          | 1          | 0.0002        | 0.0002        | 0.0002        |
| GH61        | PF03443        | Glyco_hydro_61                                         | 0          | 0          | 0             | 0             | 0             |
| <b>GH62</b> | <b>PF03664</b> | <b>Glyco_hydro_62</b>                                  | <b>0</b>   | <b>0</b>   | <b>0</b>      | <b>0</b>      | <b>0</b>      |
| GH63        | PF03200        | Glyco_hydro_63                                         | 4          | 1          | 0.0006        | 0.0002        | 0.0004        |
| GH65        | PF03632        | Glyco_hydro_65m                                        | 5          | 13         | 0.0008        | 0.0027        | 0.0018        |
| GH66        | PF13199        | Glyco_hydro_66                                         | 2          | 3          | 0.0003        | 0.0006        | 0.0005        |
| <b>GH67</b> | <b>PF07488</b> | <b>Glyco_hydro_67M</b>                                 | <b>16</b>  | <b>7</b>   | <b>0.0025</b> | <b>0.0015</b> | <b>0.002</b>  |
| GH68        | PF02435        | Glyco_hydro_68                                         | 0          | 1          | 0             | 0.0002        | 0.0001        |
| GH70/GT70   | PF02324        | Glyco_hydro_70                                         | 2          | 2          | 0.0003        | 0.0004        | 0.0004        |
| GH71        | PF03659        | Glyco_hydro_71                                         | 0          | 0          | 0             | 0             | 0             |
| GH72        | PF03198        | Glyco_hydro_72                                         | 0          | 0          | 0             | 0             | 0             |
| GH73        | PF01832        | Glucosaminidase                                        | 56         | 45         | 0.0089        | 0.0094        | 0.0092        |
| GH75        | PF07335        | Chitosanase                                            | 0          | 0          | 0             | 0             | 0             |
| GH76        | PF03663        | Glyco_hydro_76                                         | 5          | 1          | 0.0008        | 0.0002        | 0.0005        |
| GH77        | PF02446        | Glyco_hydro_77                                         | 594        | 406        | 0.0946        | 0.0847        | 0.0897        |
| <b>GH78</b> | <b>PF05592</b> | <b>Bac_rhamnosid</b>                                   | <b>54</b>  | <b>39</b>  | <b>0.0086</b> | <b>0.0081</b> | <b>0.0084</b> |
| GH79        | PF03662        | Glyco_hydro_79                                         | 0          | 0          | 0             | 0             | 0             |
| GH81        | PF03639        | Glyco_hydro_81                                         | 0          | 0          | 0             | 0             | 0             |
| GH83        | PF00423        | HN                                                     | 0          | 0          | 0             | 0             | 0             |

|                               |                |                                                  |             |             |               |               |               |
|-------------------------------|----------------|--------------------------------------------------|-------------|-------------|---------------|---------------|---------------|
| GH84                          | PF07555        | NAGidase                                         | 9           | 6           | 0.0014        | 0.0013        | 0.0013        |
| GH85                          | PF03644        | Glyco_hydro_85                                   | 3           | 0           | 0.0005        | 0             | 0.0002        |
| GH88/GH105                    | PF07470        | Glyco_hydro_88                                   | 55          | 33          | 0.0088        | 0.0069        | 0.0078        |
| GH89                          | PF05089        | NAGLU                                            | 11          | 14          | 0.0018        | 0.0029        | 0.0023        |
| GH90                          | PF09251        | Salmonella phage P22 tail-spike                  | 0           | 0           | 0             | 0             | 0             |
| GH92                          | PF07971        | Glyco_hydro_92                                   | 36          | 52          | 0.0057        | 0.0109        | 0.0083        |
| <b>GH94/GT36</b>              | <b>PF06165</b> | <b>Glyco_transf_36</b>                           | <b>111</b>  | <b>43</b>   | <b>0.0177</b> | <b>0.009</b>  | <b>0.0133</b> |
| GH97                          | PF10566        | Glyco_hydro_97                                   | 109         | 75          | 0.0174        | 0.0157        | 0.0165        |
| GH98                          | PF08306        | Glyco_hydro_98M                                  | 14          | 4           | 0.0022        | 0.0008        | 0.0015        |
| GH100                         | PF12899        | Glyco_hydro_100                                  | 0           | 0           | 0             | 0             | 0             |
| GH101                         | PF12905        | Glyco_hydro_101                                  | 0           | 0           | 0             | 0             | 0             |
| GH102                         | PF03562        | MltA                                             | 0           | 0           | 0             | 0             | 0             |
| GH108                         | PF05838        | DUF847                                           | 1           | 1           | 0.0002        | 0.0002        | 0.0002        |
| GH109                         | PF01408        | Oxidoreductase family, NAD-binding Rossmann fold | 253         | 131         | 0.0403        | 0.0273        | 0.0338        |
| GH112                         | PF09508        | Lacto-N-biose phosphorylase                      | 7           | 7           | 0.0011        | 0.0015        | 0.0013        |
| GH114                         | PF03537        | Glyco_hydro_114                                  | 22          | 4           | 0.0035        | 0.0008        | 0.0022        |
| GH116                         | PF12215        | beta-Glucocerebrosidase 2 N terminal             | 1           | 1           | 0.0002        | 0.0002        | 0.0002        |
| <b>Total CHO-GHs</b>          |                |                                                  | <b>2788</b> | <b>2345</b> | <b>0.4443</b> | <b>0.4896</b> | <b>0.4665</b> |
| Total GHs                     |                |                                                  | 6396        | 5017        | 1.0187        | 1.047         | 1.0328        |
| <b>Carbohydrate Esterases</b> |                |                                                  |             |             |               |               |               |
| CE1                           | PF00756        | Putative esterase                                | 167         | 118         | 0.0266        | 0.0246        | 0.0256        |
| CE4                           | PF01522        | Polysacc_deac_1                                  | 170         | 78          | 0.0271        | 0.0163        | 0.0217        |
| CE5                           | PF01083        | Cutinase                                         | 0           | 0           | 0             | 0             | 0             |
| CE6                           | PF03629        | Domain of unknown function (DUF303)              | 84          | 60          | 0.0134        | 0.0125        | 0.0129        |
| CE7                           | PF05448        | Acetyl xylan esterase (AXE1)                     | 21          | 6           | 0.0033        | 0.0013        | 0.0023        |
| CE8                           | PF01095        | Pectinesterase                                   | 90          | 43          | 0.0143        | 0.009         | 0.0117        |
| CE9                           | PF01979        | Amidohydrolase family                            | 154         | 74          | 0.0245        | 0.0154        | 0.02          |
| CE10                          | PF00135        | Carboxylesterase family                          | 160         | 125         | 0.0255        | 0.0261        | 0.0258        |
| CE11                          | PF03331        | LpxC                                             | 67          | 40          | 0.0107        | 0.0083        | 0.0095        |
| CE13                          | PF03283        | PAE                                              | 3           | 0           | 0.0005        | 0             | 0.0002        |
| CE14                          | PF02585        | PIG-L                                            | 33          | 12          | 0.0053        | 0.0025        | 0.0039        |
| Total CEs                     |                |                                                  | 949         | 556         | 0.1511        | 0.116         | 0.1336        |

#### Polysaccharide Lyases



|                         |         |                                |     |     |        |        |        |
|-------------------------|---------|--------------------------------|-----|-----|--------|--------|--------|
| PL1                     | PF00544 | Pec_lyase_C                    | 38  | 47  | 0.0061 | 0.0098 | 0.0079 |
| PL2                     | PF06917 | Periplasmic pectate lyase      | 0   | 0   | 0      | 0      | 0      |
| PL3                     | PF03211 | Pectate_lyase                  | 11  | 23  | 0.0018 | 0.0048 | 0.0033 |
| PL5                     | PF05426 | Alginate_lyase                 | 1   | 1   | 0.0002 | 0.0002 | 0.0002 |
| PL7/PL18                | PF08787 | Alginate lyase                 | 1   | 0   | 0.0002 | 0      | 0.0001 |
| PL8                     | PF02278 | Lyase_8                        | 1   | 1   | 0.0002 | 0.0002 | 0.0002 |
| PL10                    | PF09492 | Pectic acid lyase              | 11  | 10  | 0.0018 | 0.0021 | 0.0019 |
| PL12/PL15/<br>PL17/PL21 | PF07940 | Heparinase II/III-like protein | 3   | 4   | 0.0005 | 0.0008 | 0.0007 |
| PL16                    | PF07212 | Hyaluronidase protein (HylP)   | 0   | 0   | 0      | 0      | 0      |
| Total PLs               |         |                                | 66  | 86  | 0.0105 | 0.0179 | 0.0142 |
| <hr/>                   |         |                                |     |     |        |        |        |
| Glycosyl Transferases   |         |                                |     |     |        |        |        |
| GT1                     | PF00201 | UDPGT                          | 8   | 6   | 0.0013 | 0.0013 | 0.0013 |
| GT5                     | PF00862 | Sucrose_synth                  | 0   | 0   | 0      | 0      | 0      |
| GT6                     | PF03414 | Glyco_transf_6                 | 2   | 0   | 0.0003 | 0      | 0.0002 |
| GT7                     | PF02709 | Glyco_transf_7C                | 0   | 0   | 0      | 0      | 0      |
| GT8                     | PF01501 | Glyco_transf_8                 | 50  | 17  | 0.008  | 0.0035 | 0.0058 |
| GT9                     | PF01075 | Glyco_transf_9                 | 9   | 7   | 0.0014 | 0.0015 | 0.0014 |
| GT10                    | PF00852 | Glyco_transf_10                | 1   | 4   | 0.0002 | 0.0008 | 0.0005 |
| GT11                    | PF01531 | Glyco_transf_11                | 9   | 2   | 0.0014 | 0.0004 | 0.0009 |
| GT13                    | PF03071 | GNT-I                          | 0   | 0   | 0      | 0      | 0      |
| GT15                    | PF01793 | Glyco_transf_15                | 0   | 0   | 0      | 0      | 0      |
| GT16                    | PF05060 | MGAT2                          | 0   | 0   | 0      | 0      | 0      |
| GT17                    | PF04724 | Glyco_transf_17                | 0   | 1   | 0      | 0.0002 | 0.0001 |
| GT18                    | PF15024 | Glyco_transf_18                | 0   | 0   | 0      | 0      | 0      |
| GT19                    | PF02684 | LpxB                           | 24  | 11  | 0.0038 | 0.0023 | 0.0031 |
| GT20                    | PF00982 | Glyco_transf_20                | 0   | 7   | 0      | 0.0015 | 0.0007 |
| GT21                    | PF13506 | Glyco_transf_21                | 0   | 0   | 0      | 0      | 0      |
| GT22                    | PF03901 | Glyco_transf_22                | 0   | 0   | 0      | 0      | 0      |
| GT25                    | PF01755 | Glyco_transf_25                | 4   | 0   | 0.0006 | 0      | 0.0003 |
| GT26                    | PF03808 | Glyco_tran_WecB                | 27  | 8   | 0.0043 | 0.0017 | 0.003  |
| GT28                    | PF04101 | Glyco_transf_28                | 73  | 48  | 0.0116 | 0.01   | 0.0108 |
| GT29                    | PF00777 | Glyco_transf_29                | 0   | 0   | 0      | 0      | 0      |
| GT31                    | PF01762 | Galactosyl_T                   | 0   | 2   | 0      | 0.0004 | 0.0002 |
| GT34                    | PF05637 | Glyco_transf_34                | 0   | 1   | 0      | 0.0002 | 0.0001 |
| GT35                    | PF00343 | Phosphorylase                  | 983 | 793 | 0.1566 | 0.1655 | 0.161  |
| GT37                    | PF03254 | XG_FTase                       | 0   | 0   | 0      | 0      | 0      |
| GT39                    | PF02366 | PMT                            | 0   | 0   | 0      | 0      | 0      |
| GT41                    | PF13844 | Glyco_transf_41                | 0   | 1   | 0      | 0.0002 | 0.0001 |
| GT43                    | PF03360 | Glyco_transf_43                | 0   | 0   | 0      | 0      | 0      |

|           |         |                 |      |      |        |        |        |
|-----------|---------|-----------------|------|------|--------|--------|--------|
| GT47      | PF03016 | Exostosin       | 0    | 0    | 0      | 0      | 0      |
| GT48      | PF02364 | Glucan_synthase | 0    | 0    | 0      | 0      | 0      |
| GT49      | PF13896 | Glyco_transf_49 | 0    | 0    | 0      | 0      | 0      |
| GT50      | PF05007 | Mannosyl_trans  | 0    | 0    | 0      | 0      | 0      |
| GT51      | PF00912 | Transgly        | 194  | 71   | 0.0309 | 0.0148 | 0.0229 |
| GT52      | PF07922 | Glyco_transf_52 | 0    | 0    | 0      | 0      | 0      |
| GT53      | PF04602 | Arabinose_trans | 0    | 0    | 0      | 0      | 0      |
| GT54      | PF04666 | Glyco_transf_54 | 0    | 0    | 0      | 0      | 0      |
| GT56      | PF07429 | Glyco_transf_56 | 0    | 1    | 0      | 0.0002 | 0.0001 |
| GT57      | PF03155 | Alg6_Alg8       | 1    | 0    | 0.0002 | 0      | 0.0001 |
| GT58      | PF05208 | ALG3            | 0    | 0    | 0      | 0      | 0      |
| GT59      | PF04922 | DIE2_ALG10      | 0    | 0    | 0      | 0      | 0      |
| GT62      | PF03452 | Anp1            | 0    | 0    | 0      | 0      | 0      |
| GT64      | PF09258 | Glyco_transf_64 | 0    | 0    | 0      | 0      | 0      |
| GT66      | PF02516 | STT3            | 58   | 43   | 0.0092 | 0.009  | 0.0091 |
| GT90      | PF05686 | Glyco_transf_90 | 2    | 4    | 0.0003 | 0.0008 | 0.0006 |
| GT92      | PF01697 | Glyco_transf_92 | 2    | 7    | 0.0003 | 0.0015 | 0.0009 |
| Total GTs |         |                 | 1447 | 1034 | 0.2305 | 0.2158 | 0.2231 |

#### Carbohydrate-Binding Modules

|                           |         |                |     |     |        |        |        |
|---------------------------|---------|----------------|-----|-----|--------|--------|--------|
| CBM1                      | PF00734 | CBM_1          | 0   | 0   | 0      | 0      | 0      |
| CBM2                      | PF00553 | CBM_2          | 9   | 2   | 0.0014 | 0.0004 | 0.0009 |
| CBM3                      | PF00942 | CBM_3          | 8   | 8   | 0.0013 | 0.0017 | 0.0015 |
| CBM4/CBM9/<br>CBM16/CBM22 | PF02018 | CBM_4_9        | 194 | 181 | 0.0309 | 0.0378 | 0.0343 |
| CBM5/CBM12                | PF02839 | CBM_5_12       | 1   | 3   | 0.0002 | 0.0006 | 0.0004 |
| CBM6                      | PF03422 | CBM_6          | 68  | 56  | 0.0108 | 0.0117 | 0.0113 |
| CBM10                     | PF02013 | CBM_10         | 67  | 17  | 0.0107 | 0.0035 | 0.0071 |
| CBM11                     | PF03425 | CBM_11         | 15  | 15  | 0.0024 | 0.0031 | 0.0028 |
| CBM13                     | PF00652 | Ricin_B_lectin | 11  | 2   | 0.0018 | 0.0004 | 0.0011 |
| CBM14                     | PF01607 | CBM_14         | 0   | 0   | 0      | 0      | 0      |
| CBM15                     | PF03426 | CBM_15         | 0   | 0   | 0      | 0      | 0      |
| CBM17/CBM28               | PF03424 | CBM_17_28      | 0   | 0   | 0      | 0      | 0      |
| CBM18                     | PF00187 | Chitin_bind_1  | 8   | 2   | 0.0013 | 0.0004 | 0.0008 |
| CBM19                     | PF03427 | CBM_19         | 0   | 0   | 0      | 0      | 0      |
| CBM20                     | PF00686 | CBM_20         | 26  | 30  | 0.0041 | 0.0063 | 0.0052 |
| CBM21                     | PF03370 | CBM_21         | 18  | 0   | 0.0029 | 0      | 0.0014 |
| CBM25                     | PF03423 | CBM_25         | 15  | 9   | 0.0024 | 0.0019 | 0.0021 |
| CBM27                     | PF09212 | CBM27          | 0   | 0   | 0      | 0      | 0      |
| CBM31                     | PF11606 | AlcCBM31       | 0   | 0   | 0      | 0      | 0      |
| CBM32/CBM47               | PF00754 | F5_F8_type_C   | 48  | 28  | 0.0076 | 0.0058 | 0.0067 |
| CBM33                     | PF03067 | Chitin_bind_3  | 0   | 0   | 0      | 0      | 0      |

|                                              |         |                                                                               |             |             |               |               |               |
|----------------------------------------------|---------|-------------------------------------------------------------------------------|-------------|-------------|---------------|---------------|---------------|
| CBM34/GH13N                                  | PF02903 | Alpha amylase,<br>N-terminal ig-like<br>domain                                | 46          | 23          | 0.0073        | 0.0048        | 0.0061        |
| CBM40                                        | PF02973 | Sialidase                                                                     | 0           | 0           | 0             | 0             | 0             |
| CBM41                                        | PF03714 | Bacterial pullanase-<br>associated domain                                     | 5           | 11          | 0.0008        | 0.0023        | 0.0015        |
| CBM42                                        | PF05270 | AbfB                                                                          | 1           | 5           | 0.0002        | 0.001         | 0.0006        |
| CBM43                                        | PF07983 | X8                                                                            | 0           | 0           | 0             | 0             | 0             |
| CBM46                                        | PF03442 | Carbohydrate binding<br>domain X2                                             | 10          | 3           | 0.0016        | 0.0006        | 0.0011        |
| CBM48                                        | PF02922 | CBM_48                                                                        | 220         | 160         | 0.035         | 0.0334        | 0.0342        |
| CBM49                                        | PF09478 | CBM49                                                                         | 0           | 0           | 0             | 0             | 0             |
| CBM50                                        | PF01476 | LysM                                                                          | 106         | 76          | 0.0169        | 0.0159        | 0.0164        |
| CBM51                                        | PF08305 | NPCBM                                                                         | 1           | 5           | 0.0002        | 0.001         | 0.0006        |
| CBM52                                        | PF10645 | Carbohydrate binding<br>Di-glucose binding<br>within endoplasmic<br>reticulum | 0           | 0           | 0             | 0             | 0             |
| CBM57                                        | PF11721 |                                                                               | 9           | 9           | 0.0014        | 0.0019        | 0.0017        |
| <b>Total CHO-CBMs</b>                        |         |                                                                               | <b>372</b>  | <b>281</b>  | <b>0.0593</b> | <b>0.0586</b> | <b>0.059</b>  |
| Total CBMs                                   |         |                                                                               | 886         | 645         | 0.1411        | 0.1346        | 0.1379        |
| <b>Total CAZymes</b>                         |         |                                                                               | <b>9744</b> | <b>7338</b> | <b>1.5519</b> | <b>1.5313</b> | <b>1.5416</b> |
| Other domains associated with PCWP-degrading |         |                                                                               |             |             |               |               |               |
| Dockerin_1                                   | PF00404 | Dockerin type I repeat                                                        | 28          | 27          | 0.0045        | 0.0056        | 0.0051        |
| Cohesin                                      | PF00963 | Cohesin                                                                       | 171         | 196         | 0.0272        | 0.0409        | 0.0341        |
| Polysaccharide utilization loci              |         |                                                                               |             |             |               |               |               |
| SusC                                         | PF00593 | TonB dependent<br>receptor                                                    | 415         | 321         | 0.0661        | 0.067         | 0.0666        |
| SusD                                         | PF07980 | SusD family                                                                   | 393         | 317         | 0.0626        | 0.0662        | 0.0644        |
| SusD-like                                    | PF12741 | Susd and RagB outer<br>membrane lipoprotein                                   | 29          | 21          | 0.0046        | 0.0044        | 0.0045        |
| SusD-like_2                                  | PF12771 | Starch-binding<br>associating with outer<br>membrane                          | 34          | 27          | 0.0054        | 0.0056        | 0.0055        |
| SusD-like_3                                  | PF14322 | Starch-binding<br>associating with outer<br>membrane                          | 365         | 209         | 0.0581        | 0.0436        | 0.0509        |
| <b>Total PULs</b>                            |         |                                                                               | <b>1236</b> | <b>895</b>  | <b>0.1969</b> | <b>0.1868</b> | <b>0.1919</b> |

35 <sup>1</sup>Abundance is the percentage that the number of assigned reads for a given CAZy family to that for the  
36 non-rRNA reads in each metatranscriptomic samples.

37 \* PCWP-degradation related GHs (CHO-GHs) and CBMs (CHO-CBMs) were in bold.

38 **Table S3.** Summary of the phyla detected in this study.

| Phylum                | Number of reads |               | Abundance <sup>1</sup> (%) |                |                |
|-----------------------|-----------------|---------------|----------------------------|----------------|----------------|
|                       | CS9007          | CS9036        | CS9007                     | CS9036         | Average        |
| <b>Bacteria</b>       |                 |               |                            |                |                |
| <b>Firmicutes</b>     | <b>267717</b>   | <b>147467</b> | <b>42.6380</b>             | <b>30.7736</b> | <b>36.7058</b> |
| <b>Bacteroidetes</b>  | <b>98649</b>    | <b>57600</b>  | <b>15.7114</b>             | <b>12.0200</b> | <b>13.8657</b> |
| <b>Spirochaetes</b>   | <b>13489</b>    | <b>9492</b>   | <b>2.1483</b>              | <b>1.9808</b>  | <b>2.0646</b>  |
| <b>Proteobacteria</b> | <b>13069</b>    | <b>10033</b>  | <b>2.0814</b>              | <b>2.0937</b>  | <b>2.0876</b>  |
| <b>Actinobacteria</b> | <b>10764</b>    | <b>8550</b>   | <b>1.7143</b>              | <b>1.7842</b>  | <b>1.7493</b>  |
| <b>Fibrobacteres</b>  | <b>5958</b>     | <b>3883</b>   | <b>0.9489</b>              | <b>0.8103</b>  | <b>0.8796</b>  |
| <b>Synergistetes</b>  | <b>1601</b>     | <b>796</b>    | <b>0.2550</b>              | <b>0.1661</b>  | <b>0.2105</b>  |
| <b>Fusobacteria</b>   | <b>1160</b>     | <b>770</b>    | <b>0.1847</b>              | <b>0.1607</b>  | <b>0.1727</b>  |
| <b>Chloroflexi</b>    | <b>974</b>      | <b>575</b>    | <b>0.1551</b>              | <b>0.1200</b>  | <b>0.1376</b>  |
| Lentisphaerae         | 645             | 413           | 0.1027                     | 0.0862         | 0.0945         |
| Verrucomicrobia       | 628             | 414           | 0.1000                     | 0.0864         | 0.0932         |
| Cyanobacteria         | 613             | 539           | 0.0976                     | 0.1125         | 0.1051         |
| Thermotogae           | 529             | 340           | 0.0843                     | 0.0710         | 0.0776         |
| Tenericutes           | 479             | 363           | 0.0763                     | 0.0758         | 0.0760         |
| Planctomycetes        | 466             | 463           | 0.0742                     | 0.0966         | 0.0854         |
| Elusimicrobia         | 266             | 112           | 0.0424                     | 0.0234         | 0.0329         |
| Chlorobi              | 233             | 181           | 0.0371                     | 0.0378         | 0.0374         |
| Aquificae             | 197             | 182           | 0.0314                     | 0.0380         | 0.0347         |
| Acidobacteria         | 192             | 172           | 0.0306                     | 0.0359         | 0.0332         |
| Deferribacteres       | 162             | 139           | 0.0258                     | 0.0290         | 0.0274         |
| Saccharibacteria      | 161             | 67            | 0.0256                     | 0.0140         | 0.0198         |
| Ignavibacteriae       | 146             | 210           | 0.0233                     | 0.0438         | 0.0335         |
| Deinococcus-Thermus   | 132             | 132           | 0.0210                     | 0.0275         | 0.0243         |
| Dictyoglomi           | 70              | 64            | 0.0111                     | 0.0134         | 0.0123         |
| Nitrospirae           | 63              | 36            | 0.0100                     | 0.0075         | 0.0088         |
| Caldiserica           | 56              | 50            | 0.0089                     | 0.0104         | 0.0097         |
| Chlamydiae            | 33              | 19            | 0.0053                     | 0.0040         | 0.0046         |
| Thermodesulfobacteria | 32              | 23            | 0.0051                     | 0.0048         | 0.0049         |
| Chrysiogenetes        | 22              | 19            | 0.0035                     | 0.0040         | 0.0037         |
| Gemmatimonadetes      | 14              | 25            | 0.0022                     | 0.0052         | 0.0037         |
| Poribacteria          | 10              | 2             | 0.0016                     | 0.0004         | 0.0010         |
| <b>Archaea</b>        |                 |               |                            |                |                |
| <b>Euryarchaeota</b>  | <b>20703</b>    | <b>14684</b>  | <b>3.2973</b>              | <b>3.0643</b>  | <b>3.1808</b>  |
| Crenarchaeota         | 89              | 37            | 0.0142                     | 0.0077         | 0.0109         |
| Thaumarchaeota        | 17              | 18            | 0.0027                     | 0.0038         | 0.0032         |
| Korarchaeota          | 4               | 2             | 0.0006                     | 0.0004         | 0.0005         |
| Nanohaloarchaeota     | 2               | 1             | 0.0003                     | 0.0002         | 0.0003         |
| Parvarchaeota         | 2               | 2             | 0.0003                     | 0.0004         | 0.0004         |
| <b>Eukaryota</b>      |                 |               |                            |                |                |
| <b>Protozoa</b>       | <b>15827</b>    | <b>30566</b>  | <b>2.5207</b>              | <b>6.3785</b>  | <b>4.4496</b>  |
| <b>Fungi</b>          | <b>3477</b>     | <b>4872</b>   | <b>0.5538</b>              | <b>1.0167</b>  | <b>0.7852</b>  |

|              |               |               |                |                |                |
|--------------|---------------|---------------|----------------|----------------|----------------|
| <b>Total</b> | <b>458651</b> | <b>293313</b> | <b>73.0472</b> | <b>61.2089</b> | <b>67.1280</b> |
|--------------|---------------|---------------|----------------|----------------|----------------|

39 <sup>1</sup>Abundance is the percentage that the number of assigned reads for a given taxon to that for the  
40 non-rRNA reads in each metatranscriptomic samples.

41 \*Taxa with abundance >0.1% were in bold.

42 **Table S4.** Panorama of the genera detected in present study.

| Genus                               | Number of reads |              | Abundance <sup>1</sup> (%) |               |               |
|-------------------------------------|-----------------|--------------|----------------------------|---------------|---------------|
|                                     | CS9007          | CS9036       | CS9007                     | CS9036        | Average       |
| <b>Bacteria</b>                     |                 |              |                            |               |               |
| <b><i>Ruminococcus</i></b>          | <b>44192</b>    | <b>31837</b> | <b>7.0383</b>              | <b>6.6438</b> | <b>6.8410</b> |
| <b><i>Prevotella</i></b>            | <b>52555</b>    | <b>26860</b> | <b>8.3702</b>              | <b>5.6052</b> | <b>6.9877</b> |
| <b><i>Clostridium</i></b>           | <b>42994</b>    | <b>23160</b> | <b>6.8475</b>              | <b>4.8331</b> | <b>5.8403</b> |
| <b><i>Eubacterium</i></b>           | <b>18339</b>    | <b>10724</b> | <b>2.9208</b>              | <b>2.2379</b> | <b>2.5793</b> |
| <b><i>Bacteroides</i></b>           | <b>16151</b>    | <b>10650</b> | <b>2.5723</b>              | <b>2.2225</b> | <b>2.3974</b> |
| <b><i>Butyrivibrio</i></b>          | <b>22126</b>    | <b>9370</b>  | <b>3.5239</b>              | <b>1.9553</b> | <b>2.7396</b> |
| <b><i>Treponema</i></b>             | <b>11452</b>    | <b>8137</b>  | <b>1.8239</b>              | <b>1.6980</b> | <b>1.7610</b> |
| <b><i>Blautia</i></b>               | <b>12151</b>    | <b>4825</b>  | <b>1.9352</b>              | <b>1.0069</b> | <b>1.4711</b> |
| <b><i>Roseburia</i></b>             | <b>8334</b>     | <b>4236</b>  | <b>1.3273</b>              | <b>0.8840</b> | <b>1.1056</b> |
| <b><i>Fibrobacter</i></b>           | <b>5958</b>     | <b>3883</b>  | <b>0.9489</b>              | <b>0.8103</b> | <b>0.8796</b> |
| <b><i>Coprococcus</i></b>           | <b>7117</b>     | <b>3521</b>  | <b>1.1335</b>              | <b>0.7348</b> | <b>0.9341</b> |
| <b><i>Tannerella</i></b>            | <b>4080</b>     | <b>2417</b>  | <b>0.6498</b>              | <b>0.5044</b> | <b>0.5771</b> |
| <b><i>Marvinbryantia</i></b>        | <b>4626</b>     | <b>2105</b>  | <b>0.7368</b>              | <b>0.4393</b> | <b>0.5880</b> |
| <b><i>Oscillibacter</i></b>         | <b>4225</b>     | <b>1930</b>  | <b>0.6729</b>              | <b>0.4028</b> | <b>0.5378</b> |
| <b><i>Subdoligranulum</i></b>       | <b>3238</b>     | <b>1844</b>  | <b>0.5157</b>              | <b>0.3848</b> | <b>0.4503</b> |
| <b><i>Alistipes</i></b>             | <b>3131</b>     | <b>1684</b>  | <b>0.4987</b>              | <b>0.3514</b> | <b>0.4250</b> |
| <b><i>Pseudoflavonifractor</i></b>  | <b>3639</b>     | <b>1681</b>  | <b>0.5796</b>              | <b>0.3508</b> | <b>0.4652</b> |
| <b><i>Streptococcus</i></b>         | <b>2379</b>     | <b>1602</b>  | <b>0.3789</b>              | <b>0.3343</b> | <b>0.3566</b> |
| <b><i>Faecalibacterium</i></b>      | <b>3325</b>     | <b>1573</b>  | <b>0.5296</b>              | <b>0.3283</b> | <b>0.4289</b> |
| <b><i>Paenibacillus</i></b>         | <b>1733</b>     | <b>1470</b>  | <b>0.2760</b>              | <b>0.3068</b> | <b>0.2914</b> |
| <b><i>Anaerophaga</i></b>           | <b>1993</b>     | <b>1466</b>  | <b>0.3174</b>              | <b>0.3059</b> | <b>0.3117</b> |
| <b><i>Selenomonas</i></b>           | <b>2515</b>     | <b>1440</b>  | <b>0.4006</b>              | <b>0.3005</b> | <b>0.3505</b> |
| <b><i>Bacillus</i></b>              | <b>1994</b>     | <b>1440</b>  | <b>0.3176</b>              | <b>0.3005</b> | <b>0.3090</b> |
| <b><i>Dorea</i></b>                 | <b>3121</b>     | <b>1333</b>  | <b>0.4971</b>              | <b>0.2782</b> | <b>0.3876</b> |
| <b><i>Oribacterium</i></b>          | <b>2929</b>     | <b>1327</b>  | <b>0.4665</b>              | <b>0.2769</b> | <b>0.3717</b> |
| <b><i>Odoribacter</i></b>           | <b>2100</b>     | <b>1272</b>  | <b>0.3345</b>              | <b>0.2654</b> | <b>0.2999</b> |
| <b><i>Capnocytophaga</i></b>        | <b>2026</b>     | <b>1205</b>  | <b>0.3227</b>              | <b>0.2515</b> | <b>0.2871</b> |
| <b><i>Parabacteroides</i></b>       | <b>2004</b>     | <b>1146</b>  | <b>0.3192</b>              | <b>0.2391</b> | <b>0.2792</b> |
| <b><i>Porphyromonas</i></b>         | <b>1373</b>     | <b>1054</b>  | <b>0.2187</b>              | <b>0.2199</b> | <b>0.2193</b> |
| <b><i>Slackia</i></b>               | <b>2078</b>     | <b>1011</b>  | <b>0.3310</b>              | <b>0.2110</b> | <b>0.2710</b> |
| <b><i>Stomatobaculum</i></b>        | <b>2489</b>     | <b>980</b>   | <b>0.3964</b>              | <b>0.2045</b> | <b>0.3005</b> |
| <b><i>Lactobacillus</i></b>         | <b>1296</b>     | <b>915</b>   | <b>0.2064</b>              | <b>0.1909</b> | <b>0.1987</b> |
| <b><i>Phascolarctobacterium</i></b> | <b>1576</b>     | <b>906</b>   | <b>0.2510</b>              | <b>0.1891</b> | <b>0.2200</b> |
| <b><i>Paludibacter</i></b>          | <b>1309</b>     | <b>867</b>   | <b>0.2085</b>              | <b>0.1809</b> | <b>0.1947</b> |

|                                     |      |     |        |        |        |
|-------------------------------------|------|-----|--------|--------|--------|
| <i>Abiotrophia</i>                  | 1426 | 856 | 0.2271 | 0.1786 | 0.2029 |
| <i>Solobacterium</i>                | 1696 | 853 | 0.2701 | 0.1780 | 0.2241 |
| <i>Alloprevotella</i>               | 1209 | 842 | 0.1926 | 0.1757 | 0.1841 |
| <i>Olsenella</i>                    | 2438 | 763 | 0.3883 | 0.1592 | 0.2738 |
| <i>Mahella</i>                      | 1189 | 762 | 0.1894 | 0.1590 | 0.1742 |
| <i>Dysgonomonas</i>                 | 1067 | 724 | 0.1699 | 0.1511 | 0.1605 |
| <i>Paraprevotella</i>               | 1155 | 669 | 0.1840 | 0.1396 | 0.1618 |
| <i>Anaerotruncus</i>                | 1379 | 668 | 0.2196 | 0.1394 | 0.1795 |
| <i>Bifidobacterium</i>              | 1183 | 626 | 0.1884 | 0.1306 | 0.1595 |
| <i>Shuttleworthia</i>               | 1294 | 544 | 0.2061 | 0.1135 | 0.1598 |
| <i>Acetobacterium</i>               | 741  | 543 | 0.1180 | 0.1133 | 0.1157 |
| <i>Spirochaeta</i>                  | 707  | 518 | 0.1126 | 0.1081 | 0.1103 |
| <i>Holdemania</i>                   | 962  | 508 | 0.1532 | 0.1060 | 0.1296 |
| <i>Desulfovibrio</i>                | 723  | 498 | 0.1151 | 0.1039 | 0.1095 |
| <i>Desulfotomaculum</i>             | 810  | 493 | 0.1290 | 0.1029 | 0.1159 |
| <i>Sphaerochaeta</i>                | 1026 | 479 | 0.1634 | 0.1000 | 0.1317 |
| <i>Acetivibrio</i>                  | 715  | 478 | 0.1139 | 0.0997 | 0.1068 |
| <i>Fusobacterium</i>                | 770  | 475 | 0.1226 | 0.0991 | 0.1109 |
| <i>Pseudoramibacter</i>             | 1064 | 472 | 0.1695 | 0.0985 | 0.1340 |
| <i>Coprobacillus</i>                | 750  | 458 | 0.1194 | 0.0956 | 0.1075 |
| <i>Catenibacterium</i>              | 631  | 452 | 0.1005 | 0.0943 | 0.0974 |
| <i>Acidaminococcus</i>              | 663  | 441 | 0.1056 | 0.0920 | 0.0988 |
| <i>Bacteroidetes oral taxon 274</i> | 722  | 439 | 0.1150 | 0.0916 | 0.1033 |
| <i>Desulfosporosinus</i>            | 756  | 436 | 0.1204 | 0.0910 | 0.1057 |
| <i>Desulfitobacterium</i>           | 759  | 427 | 0.1209 | 0.0891 | 0.1050 |
| <i>Alkaliphilus</i>                 | 839  | 410 | 0.1336 | 0.0856 | 0.1096 |
| <i>Eggerthella</i>                  | 974  | 405 | 0.1551 | 0.0845 | 0.1198 |
| <i>Ethanoligenens</i>               | 759  | 392 | 0.1209 | 0.0818 | 0.1013 |
| <i>Anaerostipes</i>                 | 793  | 390 | 0.1263 | 0.0814 | 0.1038 |
| <i>Mitsuokella</i>                  | 659  | 388 | 0.1050 | 0.0810 | 0.0930 |
| <i>Erysipelatoclostridium</i>       | 750  | 372 | 0.1194 | 0.0776 | 0.0985 |
| <i>Collinsella</i>                  | 628  | 348 | 0.1000 | 0.0726 | 0.0863 |
| <i>Peptoniphilus</i>                | 637  | 340 | 0.1015 | 0.0710 | 0.0862 |
| <i>Atopobium</i>                    | 877  | 334 | 0.1397 | 0.0697 | 0.1047 |
| <i>Pyramidobacter</i>               | 752  | 305 | 0.1198 | 0.0636 | 0.0917 |
| <i>Peptoclostridium</i>             | 735  | 216 | 0.1171 | 0.0451 | 0.0811 |
| <i>Cellulosilyticum</i>             | 626  | 421 | 0.0997 | 0.0879 | 0.0938 |
| <i>Anaerofustis</i>                 | 615  | 266 | 0.0979 | 0.0555 | 0.0767 |
| <i>Lachnoanaerobaculum</i>          | 609  | 360 | 0.0970 | 0.0751 | 0.0861 |
| <i>Victivallis</i>                  | 570  | 367 | 0.0908 | 0.0766 | 0.0837 |
| <i>Thermoanaerobacter</i>           | 566  | 277 | 0.0901 | 0.0578 | 0.0740 |
| <i>Megasphaera</i>                  | 559  | 311 | 0.0890 | 0.0649 | 0.0770 |
| <i>Enterococcus</i>                 | 553  | 406 | 0.0881 | 0.0847 | 0.0864 |
| <i>Caldicellulosiruptor</i>         | 545  | 398 | 0.0868 | 0.0831 | 0.0849 |
| <i>Fluviicola</i>                   | 525  | 423 | 0.0836 | 0.0883 | 0.0859 |
| <i>Owenweeksia</i>                  | 499  | 322 | 0.0795 | 0.0672 | 0.0733 |
| <i>Sphingobacterium</i>             | 494  | 287 | 0.0787 | 0.0599 | 0.0693 |

|                              |     |     |        |        |        |
|------------------------------|-----|-----|--------|--------|--------|
| <i>Thermoanaerobacterium</i> | 480 | 257 | 0.0764 | 0.0536 | 0.0650 |
| <i>Pedobacter</i>            | 479 | 346 | 0.0763 | 0.0722 | 0.0742 |
| <i>Flavobacterium</i>        | 470 | 417 | 0.0749 | 0.0870 | 0.0809 |
| <i>Succinatimonas</i>        | 462 | 245 | 0.0736 | 0.0511 | 0.0624 |
| <i>Anaerolinea</i>           | 459 | 187 | 0.0731 | 0.0390 | 0.0561 |
| <i>Tolomonas</i>             | 438 | 259 | 0.0698 | 0.0540 | 0.0619 |
| <i>Aeromonas</i>             | 434 | 349 | 0.0691 | 0.0728 | 0.0710 |
| <i>Intestinibacter</i>       | 406 | 182 | 0.0647 | 0.0380 | 0.0513 |
| <i>Megamonas</i>             | 406 | 152 | 0.0647 | 0.0317 | 0.0482 |
| <i>Vibrio</i>                | 405 | 283 | 0.0645 | 0.0591 | 0.0618 |
| <i>Dialister</i>             | 402 | 257 | 0.0640 | 0.0536 | 0.0588 |
| <i>Turicibacter</i>          | 381 | 193 | 0.0607 | 0.0403 | 0.0505 |
| <i>Gordonibacter</i>         | 363 | 193 | 0.0578 | 0.0403 | 0.0490 |
| <i>Johnsonella</i>           | 349 | 150 | 0.0556 | 0.0313 | 0.0434 |
| <i>Listeria</i>              | 344 | 230 | 0.0548 | 0.0480 | 0.0514 |
| <i>Finegoldia</i>            | 341 | 164 | 0.0543 | 0.0342 | 0.0443 |
| <i>Bulleidia</i>             | 333 | 180 | 0.0530 | 0.0376 | 0.0453 |
| <i>Caldanaerobacter</i>      | 327 | 160 | 0.0521 | 0.0334 | 0.0427 |
| <i>Geobacter</i>             | 296 | 194 | 0.0471 | 0.0405 | 0.0438 |
| <i>Anaerococcus</i>          | 294 | 229 | 0.0468 | 0.0478 | 0.0473 |
| <i>Geobacillus</i>           | 294 | 197 | 0.0468 | 0.0411 | 0.0440 |
| <i>Synergistes</i>           | 287 | 132 | 0.0457 | 0.0275 | 0.0366 |
| <i>Haloplasma</i>            | 277 | 160 | 0.0441 | 0.0334 | 0.0388 |
| <i>Microscilla</i>           | 271 | 249 | 0.0432 | 0.0520 | 0.0476 |
| <i>Acholeplasma</i>          | 269 | 158 | 0.0428 | 0.0330 | 0.0379 |
| <i>Thermobacillus</i>        | 267 | 138 | 0.0425 | 0.0288 | 0.0357 |
| <i>Corynebacterium</i>       | 266 | 123 | 0.0424 | 0.0257 | 0.0340 |
| <i>Solitalea</i>             | 264 | 197 | 0.0420 | 0.0411 | 0.0416 |
| <i>Pelotomaculum</i>         | 262 | 104 | 0.0417 | 0.0217 | 0.0317 |
| <i>Tepidanaerobacter</i>     | 251 | 117 | 0.0400 | 0.0244 | 0.0322 |
| <i>Peptostreptococcus</i>    | 249 | 88  | 0.0397 | 0.0184 | 0.0290 |
| <i>Acetonema</i>             | 242 | 95  | 0.0385 | 0.0198 | 0.0292 |
| <i>Thermincola</i>           | 227 | 93  | 0.0362 | 0.0194 | 0.0278 |
| <i>Thermosediminibacter</i>  | 224 | 99  | 0.0357 | 0.0207 | 0.0282 |
| <i>Haliscomenobacter</i>     | 223 | 141 | 0.0355 | 0.0294 | 0.0325 |
| <i>Mucilaginibacter</i>      | 223 | 199 | 0.0355 | 0.0415 | 0.0385 |
| <i>Staphylococcus</i>        | 217 | 145 | 0.0346 | 0.0303 | 0.0324 |
| <i>Fretibacterium</i>        | 215 | 83  | 0.0342 | 0.0173 | 0.0258 |
| <i>Epulopiscium</i>          | 214 | 130 | 0.0341 | 0.0271 | 0.0306 |
| <i>Thermosinus</i>           | 206 | 120 | 0.0328 | 0.0250 | 0.0289 |
| <i>Veillonella</i>           | 206 | 137 | 0.0328 | 0.0286 | 0.0307 |
| <i>Syntrophomonas</i>        | 200 | 104 | 0.0319 | 0.0217 | 0.0268 |
| <i>Pseudomonas</i>           | 197 | 166 | 0.0314 | 0.0346 | 0.0330 |
| <i>Brachyspira</i>           | 194 | 177 | 0.0309 | 0.0369 | 0.0339 |
| <i>Leptotrichia</i>          | 192 | 136 | 0.0306 | 0.0284 | 0.0295 |
| <i>Myroides</i>              | 191 | 158 | 0.0304 | 0.0330 | 0.0317 |
| <i>Escherichia</i>           | 190 | 101 | 0.0303 | 0.0211 | 0.0257 |

|                               |     |      |        |        |        |
|-------------------------------|-----|------|--------|--------|--------|
| <i>Salmonella</i>             | 190 | 94   | 0.0303 | 0.0196 | 0.0249 |
| <i>Mogibacterium</i>          | 187 | 1777 | 0.0298 | 0.3708 | 0.2003 |
| <i>Chitinophaga</i>           | 186 | 125  | 0.0296 | 0.0261 | 0.0279 |
| <i>Parvimonas</i>             | 186 | 87   | 0.0296 | 0.0182 | 0.0239 |
| <i>Candidatus Cloacamonas</i> | 185 | 123  | 0.0295 | 0.0257 | 0.0276 |
| <i>Shewanella</i>             | 181 | 139  | 0.0288 | 0.0290 | 0.0289 |
| <i>Brevibacillus</i>          | 173 | 133  | 0.0276 | 0.0278 | 0.0277 |
| <i>Helcococcus</i>            | 169 | 76   | 0.0269 | 0.0159 | 0.0214 |
| <i>Caloramator</i>            | 166 | 342  | 0.0264 | 0.0714 | 0.0489 |
| <i>Anaeroglobus</i>           | 164 | 52   | 0.0261 | 0.0109 | 0.0185 |
| <i>Mycoplasma</i>             | 164 | 151  | 0.0261 | 0.0315 | 0.0288 |
| <i>Streptomyces</i>           | 161 | 327  | 0.0256 | 0.0682 | 0.0469 |
| <i>Caldithrix</i>             | 160 | 70   | 0.0255 | 0.0146 | 0.0200 |
| <i>Candidatus Arthromitus</i> | 160 | 38   | 0.0255 | 0.0079 | 0.0167 |
| <i>Marivirga</i>              | 160 | 131  | 0.0255 | 0.0273 | 0.0264 |
| <i>Niastella</i>              | 160 | 125  | 0.0255 | 0.0261 | 0.0258 |
| <i>Azospirillum</i>           | 158 | 213  | 0.0252 | 0.0444 | 0.0348 |
| <i>Erysipelothrix</i>         | 158 | 68   | 0.0252 | 0.0142 | 0.0197 |
| <i>Mycobacterium</i>          | 151 | 2547 | 0.0240 | 0.5315 | 0.2778 |
| <i>Actinomyces</i>            | 149 | 157  | 0.0237 | 0.0328 | 0.0282 |
| <i>Spirosoma</i>              | 149 | 77   | 0.0237 | 0.0161 | 0.0199 |
| <i>Dyadobacter</i>            | 147 | 64   | 0.0234 | 0.0134 | 0.0184 |
| <i>Moorella</i>               | 147 | 79   | 0.0234 | 0.0165 | 0.0199 |
| <i>Syntrophobotulus</i>       | 147 | 100  | 0.0234 | 0.0209 | 0.0221 |
| <i>Thermotoga</i>             | 147 | 101  | 0.0234 | 0.0211 | 0.0222 |
| <i>Leadbetterella</i>         | 146 | 74   | 0.0233 | 0.0154 | 0.0193 |
| <i>Filifactor</i>             | 143 | 73   | 0.0228 | 0.0152 | 0.0190 |
| <i>Cytophaga</i>              | 141 | 120  | 0.0225 | 0.0250 | 0.0237 |
| <i>Campylobacter</i>          | 140 | 89   | 0.0223 | 0.0186 | 0.0204 |
| <i>Dethiobacter</i>           | 140 | 40   | 0.0223 | 0.0083 | 0.0153 |
| <i>Haemophilus</i>            | 140 | 110  | 0.0223 | 0.0230 | 0.0226 |
| <i>Heliobacterium</i>         | 137 | 77   | 0.0218 | 0.0161 | 0.0189 |
| <i>Natranaerobius</i>         | 135 | 72   | 0.0215 | 0.0150 | 0.0183 |
| <i>Chryseobacterium</i>       | 133 | 133  | 0.0212 | 0.0278 | 0.0245 |
| <i>Alicyclobacillus</i>       | 130 | 69   | 0.0207 | 0.0144 | 0.0176 |
| <i>Cryptobacterium</i>        | 130 | 63   | 0.0207 | 0.0131 | 0.0169 |
| <i>Ignavibacterium</i>        | 130 | 109  | 0.0207 | 0.0227 | 0.0217 |
| <i>Runella</i>                | 126 | 82   | 0.0201 | 0.0171 | 0.0186 |
| <i>Algoriphagus</i>           | 124 | 73   | 0.0197 | 0.0152 | 0.0175 |
| <i>Burkholderia</i>           | 123 | 515  | 0.0196 | 0.1075 | 0.0635 |
| <i>Coriobacterium</i>         | 123 | 73   | 0.0196 | 0.0152 | 0.0174 |
| <i>Elusimicrobium</i>         | 121 | 58   | 0.0193 | 0.0121 | 0.0157 |
| <i>Syntrophothermus</i>       | 119 | 43   | 0.0190 | 0.0090 | 0.0140 |
| <i>Exiguobacterium</i>        | 118 | 42   | 0.0188 | 0.0088 | 0.0138 |
| <i>Chlorobium</i>             | 117 | 69   | 0.0186 | 0.0144 | 0.0165 |
| <i>Polaribacter</i>           | 117 | 66   | 0.0186 | 0.0138 | 0.0162 |
| <i>Fervidobacterium</i>       | 115 | 45   | 0.0183 | 0.0094 | 0.0139 |



|                                    |     |     |        |        |        |
|------------------------------------|-----|-----|--------|--------|--------|
| <i>Centipeda</i>                   | 113 | 69  | 0.0180 | 0.0144 | 0.0162 |
| <i>Pedosphaera</i>                 | 113 | 73  | 0.0180 | 0.0152 | 0.0166 |
| <i>Carboxydotherrnus</i>           | 112 | 58  | 0.0178 | 0.0121 | 0.0150 |
| <i>Helicobacter</i>                | 112 | 100 | 0.0178 | 0.0209 | 0.0194 |
| <i>Bilophila</i>                   | 111 | 74  | 0.0177 | 0.0154 | 0.0166 |
| <i>Actinobacillus</i>              | 109 | 40  | 0.0174 | 0.0083 | 0.0129 |
| <i>Cyanothece</i>                  | 109 | 83  | 0.0174 | 0.0173 | 0.0173 |
| <i>Propionibacterium</i>           | 109 | 89  | 0.0174 | 0.0186 | 0.0180 |
| <i>Saprospira</i>                  | 109 | 113 | 0.0174 | 0.0236 | 0.0205 |
| <i>Symbiobacterium</i>             | 109 | 38  | 0.0174 | 0.0079 | 0.0126 |
| <i>Lactococcus</i>                 | 105 | 69  | 0.0167 | 0.0144 | 0.0156 |
| <i>Magnetospirillum</i>            | 105 | 69  | 0.0167 | 0.0144 | 0.0156 |
| <i>Desulfobacterium</i>            | 104 | 67  | 0.0166 | 0.0140 | 0.0153 |
| <i>Halanaerobium</i>               | 104 | 69  | 0.0166 | 0.0144 | 0.0155 |
| <i>Fibrella</i>                    | 103 | 69  | 0.0164 | 0.0144 | 0.0154 |
| <i>Niabella</i>                    | 100 | 75  | 0.0159 | 0.0157 | 0.0158 |
| <i>Scardovia</i>                   | 99  | 89  | 0.0158 | 0.0186 | 0.0172 |
| <i>Acinetobacter</i>               | 98  | 72  | 0.0156 | 0.0150 | 0.0153 |
| <i>Sphingomonas</i>                | 98  | 108 | 0.0156 | 0.0225 | 0.0191 |
| <i>Cyclobacterium</i>              | 96  | 72  | 0.0153 | 0.0150 | 0.0152 |
| <i>Planctomyces</i>                | 96  | 95  | 0.0153 | 0.0198 | 0.0176 |
| <i>Sutterella</i>                  | 94  | 58  | 0.0150 | 0.0121 | 0.0135 |
| <i>Caldilinea</i>                  | 93  | 59  | 0.0148 | 0.0123 | 0.0136 |
| <i>Caldalkalibacillus</i>          | 92  | 46  | 0.0147 | 0.0096 | 0.0121 |
| <i>Aggregatibacter</i>             | 90  | 34  | 0.0143 | 0.0071 | 0.0107 |
| <i>Halothermothrix</i>             | 90  | 68  | 0.0143 | 0.0142 | 0.0143 |
| <i>Photobacterium</i>              | 90  | 88  | 0.0143 | 0.0184 | 0.0163 |
| <i>Oceanimonas</i>                 | 87  | 54  | 0.0139 | 0.0113 | 0.0126 |
| <i>Sebaldella</i>                  | 87  | 76  | 0.0139 | 0.0159 | 0.0149 |
| <i>Thermaerobacter</i>             | 87  | 36  | 0.0139 | 0.0075 | 0.0107 |
| <i>Cellulophaga</i>                | 86  | 57  | 0.0137 | 0.0119 | 0.0128 |
| <i>Deferribacter</i>               | 86  | 80  | 0.0137 | 0.0167 | 0.0152 |
| <i>Synechococcus</i>               | 86  | 48  | 0.0137 | 0.0100 | 0.0119 |
| <i>Candidatus Saccharibacteria</i> | 85  | 25  | 0.0135 | 0.0052 | 0.0094 |
| <i>Leeuwenhoekiella</i>            | 85  | 47  | 0.0135 | 0.0098 | 0.0117 |
| <i>Carnobacterium</i>              | 84  | 88  | 0.0134 | 0.0184 | 0.0159 |
| <i>Kordia</i>                      | 84  | 65  | 0.0134 | 0.0136 | 0.0135 |
| <i>Granulicatella</i>              | 83  | 42  | 0.0132 | 0.0088 | 0.0110 |
| <i>Lysinibacillus</i>              | 83  | 41  | 0.0132 | 0.0086 | 0.0109 |
| <i>Elizabethkingia</i>             | 81  | 49  | 0.0129 | 0.0102 | 0.0116 |
| <i>Marinitoga</i>                  | 81  | 44  | 0.0129 | 0.0092 | 0.0110 |
| <i>Zunongwangia</i>                | 81  | 48  | 0.0129 | 0.0100 | 0.0115 |
| <i>Weeksella</i>                   | 80  | 56  | 0.0127 | 0.0117 | 0.0122 |
| <i>Chthoniobacter</i>              | 79  | 44  | 0.0126 | 0.0092 | 0.0109 |
| <i>Imtechella</i>                  | 79  | 59  | 0.0126 | 0.0123 | 0.0124 |
| <i>Neisseria</i>                   | 79  | 62  | 0.0126 | 0.0129 | 0.0128 |
| <i>Sporosarcina</i>                | 79  | 32  | 0.0126 | 0.0067 | 0.0096 |

|                                       |    |     |        |        |        |
|---------------------------------------|----|-----|--------|--------|--------|
| <i>Anoxybacillus</i>                  | 77 | 28  | 0.0123 | 0.0058 | 0.0091 |
| <i>Gemella</i>                        | 77 | 71  | 0.0123 | 0.0148 | 0.0135 |
| <i>Pseudoalteromonas</i>              | 76 | 121 | 0.0121 | 0.0253 | 0.0187 |
| <i>Yersinia</i>                       | 76 | 58  | 0.0121 | 0.0121 | 0.0121 |
| <i>Dethiosulfovibrio</i>              | 75 | 40  | 0.0119 | 0.0083 | 0.0101 |
| <i>Kyrpidia</i>                       | 75 | 28  | 0.0119 | 0.0058 | 0.0089 |
| <i>Lentisphaera</i>                   | 75 | 46  | 0.0119 | 0.0096 | 0.0108 |
| <i>Anaeromyxobacter</i>               | 74 | 66  | 0.0118 | 0.0138 | 0.0128 |
| <i>Ilyobacter</i>                     | 72 | 61  | 0.0115 | 0.0127 | 0.0121 |
| <i>Rhodothermus</i>                   | 72 | 45  | 0.0115 | 0.0094 | 0.0104 |
| <i>Blastopirellula</i>                | 70 | 57  | 0.0111 | 0.0119 | 0.0115 |
| <i>Dictyoglomus</i>                   | 70 | 64  | 0.0111 | 0.0134 | 0.0123 |
| <i>Rhodospirillum</i>                 | 70 | 53  | 0.0111 | 0.0111 | 0.0111 |
| <i>Thermovibrio</i>                   | 70 | 93  | 0.0111 | 0.0194 | 0.0153 |
| <i>Aerococcus</i>                     | 69 | 47  | 0.0110 | 0.0098 | 0.0104 |
| <i>Robiginitalea</i>                  | 69 | 28  | 0.0110 | 0.0058 | 0.0084 |
| <i>Anaerobaculum</i>                  | 68 | 59  | 0.0108 | 0.0123 | 0.0116 |
| <i>Candidatus Azobacteroides</i>      | 68 | 38  | 0.0108 | 0.0079 | 0.0094 |
| <i>Pelobacter</i>                     | 68 | 51  | 0.0108 | 0.0106 | 0.0107 |
| <i>Acetohalobium</i>                  | 67 | 31  | 0.0107 | 0.0065 | 0.0086 |
| <i>Stigmatella</i>                    | 66 | 55  | 0.0105 | 0.0115 | 0.0110 |
| <i>Moraxella</i>                      | 65 | 24  | 0.0104 | 0.0050 | 0.0077 |
| <i>Pirellula</i>                      | 65 | 48  | 0.0104 | 0.0100 | 0.0102 |
| <i>Leuconostoc</i>                    | 64 | 66  | 0.0102 | 0.0138 | 0.0120 |
| <i>Gramella</i>                       | 63 | 26  | 0.0100 | 0.0054 | 0.0077 |
| <i>Kosmotoga</i>                      | 63 | 50  | 0.0100 | 0.0104 | 0.0102 |
| <i>Aminobacterium</i>                 | 61 | 48  | 0.0097 | 0.0100 | 0.0099 |
| <i>Coleofasciculus chthonoplastes</i> | 61 | 36  | 0.0097 | 0.0075 | 0.0086 |
| <i>Chloroflexus</i>                   | 60 | 80  | 0.0096 | 0.0167 | 0.0131 |
| <i>Verrucomicrobium</i>               | 60 | 39  | 0.0096 | 0.0081 | 0.0088 |
| <i>Diplosphaera</i>                   | 59 | 31  | 0.0094 | 0.0065 | 0.0079 |
| <i>Lacinutrix</i>                     | 59 | 53  | 0.0094 | 0.0111 | 0.0102 |
| <i>Zobellia</i>                       | 59 | 32  | 0.0094 | 0.0067 | 0.0080 |
| <i>Roseiflexus</i>                    | 58 | 40  | 0.0092 | 0.0083 | 0.0088 |
| <i>Alteromonas</i>                    | 57 | 29  | 0.0091 | 0.0061 | 0.0076 |
| <i>Gemmata</i>                        | 57 | 91  | 0.0091 | 0.0190 | 0.0140 |
| <i>Haliangium</i>                     | 57 | 75  | 0.0091 | 0.0157 | 0.0124 |
| <i>Ornithinibacillus</i>              | 57 | 31  | 0.0091 | 0.0065 | 0.0078 |
| <i>Caldisericum</i>                   | 56 | 50  | 0.0089 | 0.0104 | 0.0097 |
| <i>Frankia</i>                        | 56 | 61  | 0.0089 | 0.0127 | 0.0108 |
| <i>Oceanicola</i>                     | 56 | 42  | 0.0089 | 0.0088 | 0.0088 |
| <i>Sphingopyxis</i>                   | 56 | 7   | 0.0089 | 0.0015 | 0.0052 |
| <i>Desmospora</i>                     | 55 | 32  | 0.0088 | 0.0067 | 0.0077 |
| <i>Desulfobulbus</i>                  | 55 | 16  | 0.0088 | 0.0033 | 0.0060 |
| <i>Pasteurella</i>                    | 55 | 35  | 0.0088 | 0.0073 | 0.0080 |
| <i>Bradyrhizobium</i>                 | 54 | 52  | 0.0086 | 0.0109 | 0.0097 |
| <i>Gordonia</i>                       | 54 | 102 | 0.0086 | 0.0213 | 0.0149 |

|                           |    |     |        |        |        |
|---------------------------|----|-----|--------|--------|--------|
| <i>Phaeospirillum</i>     | 54 | 42  | 0.0086 | 0.0088 | 0.0087 |
| <i>Pseudonocardia</i>     | 54 | 24  | 0.0086 | 0.0050 | 0.0068 |
| <i>Chloroherpeton</i>     | 52 | 41  | 0.0083 | 0.0086 | 0.0084 |
| <i>Ktedonobacter</i>      | 52 | 45  | 0.0083 | 0.0094 | 0.0088 |
| <i>Opitutus</i>           | 52 | 53  | 0.0083 | 0.0111 | 0.0097 |
| <i>Sphingobium</i>        | 52 | 59  | 0.0083 | 0.0123 | 0.0103 |
| <i>Enterobacter</i>       | 51 | 39  | 0.0081 | 0.0081 | 0.0081 |
| <i>Rheinheimera</i>       | 51 | 48  | 0.0081 | 0.0100 | 0.0091 |
| <i>Klebsiella</i>         | 50 | 38  | 0.0080 | 0.0079 | 0.0079 |
| <i>Mesotoga</i>           | 50 | 29  | 0.0080 | 0.0061 | 0.0070 |
| <i>Oceanobacillus</i>     | 50 | 56  | 0.0080 | 0.0117 | 0.0098 |
| <i>Leptospira</i>         | 49 | 59  | 0.0078 | 0.0123 | 0.0101 |
| <i>Maribacter</i>         | 49 | 39  | 0.0078 | 0.0081 | 0.0080 |
| <i>Thermanaerovibrio</i>  | 49 | 35  | 0.0078 | 0.0073 | 0.0076 |
| <i>Coralimargarita</i>    | 48 | 31  | 0.0076 | 0.0065 | 0.0071 |
| <i>Mesorhizobium</i>      | 48 | 81  | 0.0076 | 0.0169 | 0.0123 |
| <i>Moritella</i>          | 48 | 34  | 0.0076 | 0.0071 | 0.0074 |
| <i>Rhizobium</i>          | 48 | 40  | 0.0076 | 0.0083 | 0.0080 |
| <i>Rhodopirellula</i>     | 48 | 38  | 0.0076 | 0.0079 | 0.0078 |
| <i>Dehalococcoides</i>    | 47 | 38  | 0.0075 | 0.0079 | 0.0077 |
| <i>Desulfatibacillum</i>  | 47 | 54  | 0.0075 | 0.0113 | 0.0094 |
| <i>Singulisphaera</i>     | 47 | 54  | 0.0075 | 0.0113 | 0.0094 |
| <i>Sorangium</i>          | 47 | 76  | 0.0075 | 0.0159 | 0.0117 |
| <i>Syntrophobacter</i>    | 47 | 36  | 0.0075 | 0.0075 | 0.0075 |
| <i>Akkermansia</i>        | 46 | 33  | 0.0073 | 0.0069 | 0.0071 |
| <i>Gardnerella</i>        | 46 | 88  | 0.0073 | 0.0184 | 0.0128 |
| <i>Psychroflexus</i>      | 46 | 19  | 0.0073 | 0.0040 | 0.0056 |
| <i>Mesoflavibacter</i>    | 45 | 34  | 0.0072 | 0.0071 | 0.0071 |
| <i>OM60 clade</i>         | 45 | 16  | 0.0072 | 0.0033 | 0.0053 |
| <i>Brevundimonas</i>      | 44 | 6   | 0.0070 | 0.0013 | 0.0041 |
| <i>Dehalogenimonas</i>    | 44 | 10  | 0.0070 | 0.0021 | 0.0045 |
| <i>Eremococcus</i>        | 44 | 29  | 0.0070 | 0.0061 | 0.0065 |
| <i>Mobiluncus</i>         | 44 | 23  | 0.0070 | 0.0048 | 0.0059 |
| <i>Sporolactobacillus</i> | 44 | 369 | 0.0070 | 0.0770 | 0.0420 |
| <i>Muricauda</i>          | 43 | 36  | 0.0068 | 0.0075 | 0.0072 |
| <i>Pediococcus</i>        | 43 | 43  | 0.0068 | 0.0090 | 0.0079 |
| <i>Plesiocystis</i>       | 43 | 66  | 0.0068 | 0.0138 | 0.0103 |
| <i>Thiorhodovibrio</i>    | 43 | 32  | 0.0068 | 0.0067 | 0.0068 |
| <i>Ammonifex</i>          | 42 | 32  | 0.0067 | 0.0067 | 0.0067 |
| <i>Deinococcus</i>        | 42 | 70  | 0.0067 | 0.0146 | 0.0106 |
| <i>Krokinobacter</i>      | 42 | 32  | 0.0067 | 0.0067 | 0.0067 |
| <i>Thermosipho</i>        | 42 | 50  | 0.0067 | 0.0104 | 0.0086 |
| <i>Desulfococcus</i>      | 41 | 45  | 0.0065 | 0.0094 | 0.0080 |
| <i>Dokdonia</i>           | 41 | 23  | 0.0065 | 0.0048 | 0.0057 |
| <i>Idiomarina</i>         | 41 | 45  | 0.0065 | 0.0094 | 0.0080 |
| <i>Methylomicrobium</i>   | 41 | 39  | 0.0065 | 0.0081 | 0.0073 |
| <i>Arcobacter</i>         | 40 | 24  | 0.0064 | 0.0050 | 0.0057 |

|                                       |    |    |        |        |        |
|---------------------------------------|----|----|--------|--------|--------|
| <i>Candidatus Chloracidobacterium</i> | 40 | 18 | 0.0064 | 0.0038 | 0.0051 |
| <i>Pantoea</i>                        | 40 | 35 | 0.0064 | 0.0073 | 0.0068 |
| <i>Proteus</i>                        | 40 | 14 | 0.0064 | 0.0029 | 0.0046 |
| <i>Psychromonas</i>                   | 40 | 18 | 0.0064 | 0.0038 | 0.0051 |
| <i>Brucella</i>                       | 39 | 7  | 0.0062 | 0.0015 | 0.0038 |
| <i>Corallococcus</i>                  | 39 | 21 | 0.0062 | 0.0044 | 0.0053 |
| <i>Francisella</i>                    | 39 | 29 | 0.0062 | 0.0061 | 0.0061 |
| <i>Glaciecola</i>                     | 39 | 18 | 0.0062 | 0.0038 | 0.0050 |
| <i>Oxalobacter</i>                    | 39 | 26 | 0.0062 | 0.0054 | 0.0058 |
| <i>Riemerella</i>                     | 39 | 42 | 0.0062 | 0.0088 | 0.0075 |
| <i>Candidatus Koribacter</i>          | 38 | 36 | 0.0061 | 0.0075 | 0.0068 |
| <i>Micavibrio</i>                     | 38 | 59 | 0.0061 | 0.0123 | 0.0092 |
| <i>Myxococcus</i>                     | 38 | 21 | 0.0061 | 0.0044 | 0.0052 |
| <i>Nostoc</i>                         | 38 | 39 | 0.0061 | 0.0081 | 0.0071 |
| <i>Providencia</i>                    | 38 | 26 | 0.0061 | 0.0054 | 0.0057 |
| <i>Gallibacterium</i>                 | 37 | 40 | 0.0059 | 0.0083 | 0.0071 |
| <i>Legionella</i>                     | 37 | 24 | 0.0059 | 0.0050 | 0.0055 |
| <i>Nocardioides</i>                   | 37 | 18 | 0.0059 | 0.0038 | 0.0048 |
| <i>Novosphingobium</i>                | 37 | 43 | 0.0059 | 0.0090 | 0.0074 |
| <i>Planococcus</i>                    | 37 | 57 | 0.0059 | 0.0119 | 0.0089 |
| <i>Streptobacillus</i>                | 37 | 21 | 0.0059 | 0.0044 | 0.0051 |
| <i>Sulfurihydrogenibium</i>           | 37 | 24 | 0.0059 | 0.0050 | 0.0055 |
| <i>Acaryochloris</i>                  | 36 | 24 | 0.0057 | 0.0050 | 0.0054 |
| <i>Bizionia</i>                       | 36 | 27 | 0.0057 | 0.0056 | 0.0057 |
| <i>Candidatus Amoebophilus</i>        | 36 | 37 | 0.0057 | 0.0077 | 0.0067 |
| <i>Halomonas</i>                      | 36 | 40 | 0.0057 | 0.0083 | 0.0070 |
| <i>Xanthomonas</i>                    | 36 | 60 | 0.0057 | 0.0125 | 0.0091 |
| <i>Acidovorax</i>                     | 35 | 20 | 0.0056 | 0.0042 | 0.0049 |
| <i>Cellvibrio</i>                     | 35 | 29 | 0.0056 | 0.0061 | 0.0058 |
| <i>Gillisia</i>                       | 35 | 20 | 0.0056 | 0.0042 | 0.0049 |
| <i>Herpetosiphon</i>                  | 35 | 28 | 0.0056 | 0.0058 | 0.0057 |
| <i>Methylobacterium</i>               | 35 | 57 | 0.0056 | 0.0119 | 0.0087 |
| <i>Desulfuromonas</i>                 | 34 | 40 | 0.0054 | 0.0083 | 0.0069 |
| <i>Ferrimonas</i>                     | 34 | 13 | 0.0054 | 0.0027 | 0.0041 |
| <i>Leptonema</i>                      | 34 | 35 | 0.0054 | 0.0073 | 0.0064 |
| <i>Rickettsia</i>                     | 34 | 23 | 0.0054 | 0.0048 | 0.0051 |
| <i>Sphaerobacter</i>                  | 34 | 20 | 0.0054 | 0.0042 | 0.0048 |
| <i>Acidithiobacillus</i>              | 33 | 16 | 0.0053 | 0.0033 | 0.0043 |
| <i>Aminomonas</i>                     | 33 | 15 | 0.0053 | 0.0031 | 0.0042 |
| <i>Basfia</i>                         | 33 | 20 | 0.0053 | 0.0042 | 0.0047 |
| <i>Candidatus Kuenenia</i>            | 33 | 17 | 0.0053 | 0.0035 | 0.0044 |
| <i>Cellulomonas</i>                   | 33 | 27 | 0.0053 | 0.0056 | 0.0054 |
| <i>Dickeya</i>                        | 33 | 30 | 0.0053 | 0.0063 | 0.0058 |
| <i>Parascardovia</i>                  | 33 | 21 | 0.0053 | 0.0044 | 0.0048 |
| <i>Truepera</i>                       | 33 | 25 | 0.0053 | 0.0052 | 0.0052 |
| <i>Crocospaera</i>                    | 32 | 14 | 0.0051 | 0.0029 | 0.0040 |
| <i>Jonquetella</i>                    | 32 | 39 | 0.0051 | 0.0081 | 0.0066 |

|                                |    |    |        |        |        |
|--------------------------------|----|----|--------|--------|--------|
| <i>Salinibacter</i>            | 32 | 18 | 0.0051 | 0.0038 | 0.0044 |
| <i>Candidatus Solibacter</i>   | 31 | 33 | 0.0049 | 0.0069 | 0.0059 |
| <i>Holophaga</i>               | 31 | 28 | 0.0049 | 0.0058 | 0.0054 |
| <i>Petrotoga</i>               | 31 | 21 | 0.0049 | 0.0044 | 0.0047 |
| <i>Serratia</i>                | 31 | 26 | 0.0049 | 0.0054 | 0.0052 |
| <i>Agrobacterium</i>           | 30 | 12 | 0.0048 | 0.0025 | 0.0036 |
| <i>Beggiatoa</i>               | 30 | 48 | 0.0048 | 0.0100 | 0.0074 |
| <i>Denitrovibrio</i>           | 30 | 27 | 0.0048 | 0.0056 | 0.0052 |
| <i>Nitrosomonas</i>            | 30 | 10 | 0.0048 | 0.0021 | 0.0034 |
| <i>Oscillochloris</i>          | 30 | 17 | 0.0048 | 0.0035 | 0.0042 |
| <i>Ralstonia</i>               | 30 | 27 | 0.0048 | 0.0056 | 0.0052 |
| <i>Trichodesmium</i>           | 30 | 23 | 0.0048 | 0.0048 | 0.0048 |
| <i>Asticcacaulis</i>           | 29 | 22 | 0.0046 | 0.0046 | 0.0046 |
| <i>Croceibacter</i>            | 29 | 31 | 0.0046 | 0.0065 | 0.0055 |
| <i>Desulfobacter</i>           | 29 | 17 | 0.0046 | 0.0035 | 0.0041 |
| <i>Isosphaera</i>              | 29 | 23 | 0.0046 | 0.0048 | 0.0047 |
| <i>Methylacidiphilum</i>       | 29 | 11 | 0.0046 | 0.0023 | 0.0035 |
| <i>Microbacterium</i>          | 29 | 11 | 0.0046 | 0.0023 | 0.0035 |
| <i>Rhodopseudomonas</i>        | 29 | 19 | 0.0046 | 0.0040 | 0.0043 |
| <i>Roseobacter</i>             | 29 | 12 | 0.0046 | 0.0025 | 0.0036 |
| <i>Shigella</i>                | 29 | 16 | 0.0046 | 0.0033 | 0.0040 |
| <i>Tetragenococcus</i>         | 29 | 21 | 0.0046 | 0.0044 | 0.0045 |
| <i>Thermovirga</i>             | 29 | 40 | 0.0046 | 0.0083 | 0.0065 |
| <i>Granulicella</i>            | 28 | 26 | 0.0045 | 0.0054 | 0.0049 |
| <i>Marinobacter</i>            | 28 | 18 | 0.0045 | 0.0038 | 0.0041 |
| <i>Nitrosococcus</i>           | 28 | 18 | 0.0045 | 0.0038 | 0.0041 |
| <i>Pelodictyon</i>             | 28 | 40 | 0.0045 | 0.0083 | 0.0064 |
| <i>Thermobaculum</i>           | 28 | 22 | 0.0045 | 0.0046 | 0.0045 |
| <i>Borrelia</i>                | 27 | 80 | 0.0043 | 0.0167 | 0.0105 |
| <i>Candidatus Desulforudis</i> | 27 | 20 | 0.0043 | 0.0042 | 0.0042 |
| <i>Edwardsiella</i>            | 27 | 24 | 0.0043 | 0.0050 | 0.0047 |
| <i>Halobacillus</i>            | 27 | 27 | 0.0043 | 0.0056 | 0.0050 |
| <i>Psychrobacter</i>           | 27 | 24 | 0.0043 | 0.0050 | 0.0047 |
| <i>Saccharomonospora</i>       | 27 | 16 | 0.0043 | 0.0033 | 0.0038 |
| <i>Xenorhabdus</i>             | 27 | 23 | 0.0043 | 0.0048 | 0.0045 |
| <i>Desulfarculus</i>           | 26 | 34 | 0.0041 | 0.0071 | 0.0056 |
| <i>Kingella</i>                | 26 | 19 | 0.0041 | 0.0040 | 0.0041 |
| <i>Sinorhizobium</i>           | 26 | 17 | 0.0041 | 0.0035 | 0.0038 |
| <i>Thermomicrobium</i>         | 26 | 21 | 0.0041 | 0.0044 | 0.0043 |
| <i>Facklamia</i>               | 25 | 23 | 0.0040 | 0.0048 | 0.0044 |
| <i>Lentibacillus</i>           | 25 | 21 | 0.0040 | 0.0044 | 0.0042 |
| <i>Microcystis</i>             | 25 | 54 | 0.0040 | 0.0113 | 0.0076 |
| <i>Arthrobacter</i>            | 24 | 45 | 0.0038 | 0.0094 | 0.0066 |
| <i>Calditerrivibrio</i>        | 24 | 23 | 0.0038 | 0.0048 | 0.0043 |
| <i>Chlorobaculum</i>           | 24 | 21 | 0.0038 | 0.0044 | 0.0041 |
| <i>Cupriavidus</i>             | 24 | 18 | 0.0038 | 0.0038 | 0.0038 |
| <i>Hippea</i>                  | 24 | 21 | 0.0038 | 0.0044 | 0.0041 |

|                            |    |    |        |        |        |
|----------------------------|----|----|--------|--------|--------|
| <i>Leptospirillum</i>      | 24 | 6  | 0.0038 | 0.0013 | 0.0025 |
| <i>Mannheimia</i>          | 24 | 21 | 0.0038 | 0.0044 | 0.0041 |
| <i>Ochrobactrum</i>        | 24 | 28 | 0.0038 | 0.0058 | 0.0048 |
| <i>Rhodococcus</i>         | 24 | 31 | 0.0038 | 0.0065 | 0.0051 |
| <i>Thermodesulfovibrio</i> | 24 | 22 | 0.0038 | 0.0046 | 0.0042 |
| <i>Desulfomicrobium</i>    | 23 | 15 | 0.0037 | 0.0031 | 0.0034 |
| <i>Hahella</i>             | 23 | 12 | 0.0037 | 0.0025 | 0.0031 |
| <i>Methyloversatilis</i>   | 23 | 12 | 0.0037 | 0.0025 | 0.0031 |
| <i>Arthrospira</i>         | 22 | 26 | 0.0035 | 0.0054 | 0.0045 |
| <i>Desulfurispirillum</i>  | 22 | 19 | 0.0035 | 0.0040 | 0.0037 |
| <i>Flexistipes</i>         | 22 | 9  | 0.0035 | 0.0019 | 0.0027 |
| <i>Labrenzia</i>           | 22 | 23 | 0.0035 | 0.0048 | 0.0042 |
| <i>Marinomonas</i>         | 22 | 21 | 0.0035 | 0.0044 | 0.0039 |
| <i>Meiothermus</i>         | 22 | 10 | 0.0035 | 0.0021 | 0.0028 |
| <i>Melissococcus</i>       | 22 | 18 | 0.0035 | 0.0038 | 0.0036 |
| <i>Micromonospora</i>      | 22 | 24 | 0.0035 | 0.0050 | 0.0043 |
| <i>Oscillatoria</i>        | 22 | 24 | 0.0035 | 0.0050 | 0.0043 |
| <i>Pectobacterium</i>      | 22 | 26 | 0.0035 | 0.0054 | 0.0045 |
| <i>Roseomonas</i>          | 22 | 22 | 0.0035 | 0.0046 | 0.0040 |
| <i>Saccharopolyspora</i>   | 22 | 23 | 0.0035 | 0.0048 | 0.0042 |
| <i>Thermus</i>             | 22 | 16 | 0.0035 | 0.0033 | 0.0034 |
| <i>Acetobacter</i>         | 21 | 20 | 0.0033 | 0.0042 | 0.0038 |
| <i>Aquifex</i>             | 21 | 11 | 0.0033 | 0.0023 | 0.0028 |
| <i>Citrobacter</i>         | 21 | 17 | 0.0033 | 0.0035 | 0.0034 |
| <i>Desulfotalea</i>        | 21 | 18 | 0.0033 | 0.0038 | 0.0036 |
| <i>Kineococcus</i>         | 21 | 10 | 0.0033 | 0.0021 | 0.0027 |
| <i>Methylomonas</i>        | 21 | 9  | 0.0033 | 0.0019 | 0.0026 |
| <i>Oenococcus</i>          | 21 | 19 | 0.0033 | 0.0040 | 0.0037 |
| <i>Rhodobacter</i>         | 21 | 23 | 0.0033 | 0.0048 | 0.0041 |
| <i>Thiocapsa</i>           | 21 | 12 | 0.0033 | 0.0025 | 0.0029 |
| <i>Weissella</i>           | 21 | 36 | 0.0033 | 0.0075 | 0.0054 |
| <i>Coprothermobacter</i>   | 20 | 9  | 0.0032 | 0.0019 | 0.0025 |
| <i>Desulfurobacterium</i>  | 20 | 19 | 0.0032 | 0.0040 | 0.0036 |
| <i>Gluconacetobacter</i>   | 20 | 18 | 0.0032 | 0.0038 | 0.0035 |
| <i>Heliobacillus</i>       | 20 | 7  | 0.0032 | 0.0015 | 0.0023 |
| <i>Pseudovibrio</i>        | 20 | 9  | 0.0032 | 0.0019 | 0.0025 |
| <i>Saccharophagus</i>      | 20 | 20 | 0.0032 | 0.0042 | 0.0037 |
| <i>Sulfobacillus</i>       | 20 | 15 | 0.0032 | 0.0031 | 0.0032 |
| <i>Thermodesulfatator</i>  | 20 | 15 | 0.0032 | 0.0031 | 0.0032 |
| <i>Arcanobacterium</i>     | 19 | 8  | 0.0030 | 0.0017 | 0.0023 |
| <i>Brachybacterium</i>     | 19 | 19 | 0.0030 | 0.0040 | 0.0035 |
| <i>Fischerella</i>         | 19 | 10 | 0.0030 | 0.0021 | 0.0026 |
| <i>Kocuria</i>             | 19 | 3  | 0.0030 | 0.0006 | 0.0018 |
| <i>Lyngbya</i>             | 19 | 27 | 0.0030 | 0.0056 | 0.0043 |
| <i>Microcoleus</i>         | 19 | 38 | 0.0030 | 0.0079 | 0.0055 |
| <i>Moorea</i>              | 19 | 12 | 0.0030 | 0.0025 | 0.0028 |
| <i>Ruegeria</i>            | 19 | 37 | 0.0030 | 0.0077 | 0.0054 |

|                            |    |     |        |        |        |
|----------------------------|----|-----|--------|--------|--------|
| <i>Streptosporangium</i>   | 19 | 13  | 0.0030 | 0.0027 | 0.0029 |
| <i>Teredinibacter</i>      | 19 | 11  | 0.0030 | 0.0023 | 0.0027 |
| <i>Actinoplanes</i>        | 18 | 25  | 0.0029 | 0.0052 | 0.0040 |
| <i>Aliivibrio</i>          | 18 | 16  | 0.0029 | 0.0033 | 0.0031 |
| <i>Beutenbergia</i>        | 18 | 13  | 0.0029 | 0.0027 | 0.0028 |
| <i>Desulfobacca</i>        | 18 | 12  | 0.0029 | 0.0025 | 0.0027 |
| <i>Grimontia</i>           | 18 | 17  | 0.0029 | 0.0035 | 0.0032 |
| <i>Hydrogenivirga</i>      | 18 | 8   | 0.0029 | 0.0017 | 0.0023 |
| <i>Magnetococcus</i>       | 18 | 19  | 0.0029 | 0.0040 | 0.0034 |
| <i>Rhodanobacter</i>       | 18 | 32  | 0.0029 | 0.0067 | 0.0048 |
| <i>Simonsiella</i>         | 18 | 1   | 0.0029 | 0.0002 | 0.0015 |
| <i>Spiroplasma</i>         | 18 | 24  | 0.0029 | 0.0050 | 0.0039 |
| <i>Caulobacter</i>         | 17 | 19  | 0.0027 | 0.0040 | 0.0033 |
| <i>Hafnia</i>              | 17 | 7   | 0.0027 | 0.0015 | 0.0021 |
| <i>Histophilus</i>         | 17 | 6   | 0.0027 | 0.0013 | 0.0020 |
| <i>Octadecabacter</i>      | 17 | 10  | 0.0027 | 0.0021 | 0.0024 |
| <i>Syntrophus</i>          | 17 | 4   | 0.0027 | 0.0008 | 0.0018 |
| <i>Bacteriovorax</i>       | 16 | 19  | 0.0025 | 0.0040 | 0.0033 |
| <i>Candidatus Regiella</i> | 16 | 1   | 0.0025 | 0.0002 | 0.0014 |
| <i>Colwellia</i>           | 16 | 11  | 0.0025 | 0.0023 | 0.0024 |
| <i>Limnobacter</i>         | 16 | 1   | 0.0025 | 0.0002 | 0.0014 |
| <i>Melioribacter</i>       | 16 | 101 | 0.0025 | 0.0211 | 0.0118 |
| <i>Pelagibaca</i>          | 16 | 7   | 0.0025 | 0.0015 | 0.0020 |
| <i>SAR92 clade</i>         | 16 | 7   | 0.0025 | 0.0015 | 0.0020 |
| <i>Solibacillus</i>        | 16 | 26  | 0.0025 | 0.0054 | 0.0040 |
| <i>Aromatoleum</i>         | 15 | 4   | 0.0024 | 0.0008 | 0.0016 |
| <i>Bdellovibrio</i>        | 15 | 8   | 0.0024 | 0.0017 | 0.0020 |
| <i>Bermanella</i>          | 15 | 14  | 0.0024 | 0.0029 | 0.0027 |
| <i>Conexibacter</i>        | 15 | 17  | 0.0024 | 0.0035 | 0.0030 |
| <i>Desulfurivibrio</i>     | 15 | 5   | 0.0024 | 0.0010 | 0.0017 |
| <i>Dolosigranulum</i>      | 15 | 8   | 0.0024 | 0.0017 | 0.0020 |
| <i>Ehrlichia</i>           | 15 | 1   | 0.0024 | 0.0002 | 0.0013 |
| <i>Gloeobacter</i>         | 15 | 10  | 0.0024 | 0.0021 | 0.0022 |
| <i>Methylophaga</i>        | 15 | 19  | 0.0024 | 0.0040 | 0.0032 |
| <i>Nocardiopsis</i>        | 15 | 16  | 0.0024 | 0.0033 | 0.0029 |
| <i>Persephonella</i>       | 15 | 17  | 0.0024 | 0.0035 | 0.0030 |
| <i>Photorhabdus</i>        | 15 | 21  | 0.0024 | 0.0044 | 0.0034 |
| <i>Reinekea blandensis</i> | 15 | 11  | 0.0024 | 0.0023 | 0.0023 |
| <i>Rubrobacter</i>         | 15 | 4   | 0.0024 | 0.0008 | 0.0016 |
| <i>Verminephrobacter</i>   | 15 | 8   | 0.0024 | 0.0017 | 0.0020 |
| <i>Azoarcus</i>            | 14 | 22  | 0.0022 | 0.0046 | 0.0034 |
| <i>Caminibacter</i>        | 14 | 4   | 0.0022 | 0.0008 | 0.0015 |
| <i>Desulfohalobium</i>     | 14 | 8   | 0.0022 | 0.0017 | 0.0019 |
| <i>Endoriftia</i>          | 14 | 1   | 0.0022 | 0.0002 | 0.0012 |
| <i>Methylibium</i>         | 14 | 4   | 0.0022 | 0.0008 | 0.0015 |
| <i>Nitrospira</i>          | 14 | 6   | 0.0022 | 0.0013 | 0.0017 |
| <i>Pelosinus</i>           | 14 | 143 | 0.0022 | 0.0298 | 0.0160 |

|                                   |    |     |        |        |        |
|-----------------------------------|----|-----|--------|--------|--------|
| <i>Pontibacter</i>                | 14 | 105 | 0.0022 | 0.0219 | 0.0121 |
| <i>Pseudoxanthomonas</i>          | 14 | 11  | 0.0022 | 0.0023 | 0.0023 |
| <i>Sulfurimonas</i>               | 14 | 19  | 0.0022 | 0.0040 | 0.0031 |
| <i>Thioalkalivibrio</i>           | 14 | 14  | 0.0022 | 0.0029 | 0.0026 |
| <i>Achromobacter</i>              | 13 | 19  | 0.0021 | 0.0040 | 0.0030 |
| <i>Desulfonatrosospira</i>        | 13 | 17  | 0.0021 | 0.0035 | 0.0028 |
| <i>Erythrobacter</i>              | 13 | 10  | 0.0021 | 0.0021 | 0.0021 |
| <i>Gemmatimonas</i>               | 13 | 25  | 0.0021 | 0.0052 | 0.0036 |
| <i>Hyphomonas</i>                 | 13 | 9   | 0.0021 | 0.0019 | 0.0020 |
| <i>Marinobacterium</i>            | 13 | 5   | 0.0021 | 0.0010 | 0.0016 |
| <i>Nitratifractor</i>             | 13 | 5   | 0.0021 | 0.0010 | 0.0016 |
| <i>Nitrosospira</i>               | 13 | 1   | 0.0021 | 0.0002 | 0.0011 |
| <i>Polaromonas</i>                | 13 | 9   | 0.0021 | 0.0019 | 0.0020 |
| <i>Rothia</i>                     | 13 | 24  | 0.0021 | 0.0050 | 0.0035 |
| <i>Rubrivivax</i>                 | 13 | 14  | 0.0021 | 0.0029 | 0.0025 |
| <i>Ruminiclostridium</i>          | 13 | 2   | 0.0021 | 0.0004 | 0.0012 |
| <i>Sanguibacter</i>               | 13 | 12  | 0.0021 | 0.0025 | 0.0023 |
| <i>Stenotrophomonas</i>           | 13 | 22  | 0.0021 | 0.0046 | 0.0033 |
| <i>Terriglobus</i>                | 13 | 22  | 0.0021 | 0.0046 | 0.0033 |
| <i>Thermobifida</i>               | 13 | 8   | 0.0021 | 0.0017 | 0.0019 |
| <i>Trueperella</i>                | 13 | 6   | 0.0021 | 0.0013 | 0.0017 |
| <i>Chromobacterium</i>            | 12 | 9   | 0.0019 | 0.0019 | 0.0019 |
| <i>Citromicrobium</i>             | 12 | 8   | 0.0019 | 0.0017 | 0.0018 |
| <i>Macrococcus</i>                | 12 | 16  | 0.0019 | 0.0033 | 0.0026 |
| <i>Parasutterella</i>             | 12 | 22  | 0.0019 | 0.0046 | 0.0033 |
| <i>Pelagibacterium</i>            | 12 | 11  | 0.0019 | 0.0023 | 0.0021 |
| <i>Phycisphaera</i>               | 12 | 6   | 0.0019 | 0.0013 | 0.0016 |
| <i>Taylorella</i>                 | 12 | 12  | 0.0019 | 0.0025 | 0.0022 |
| <i>Thauera</i>                    | 12 | 12  | 0.0019 | 0.0025 | 0.0022 |
| <i>Thermodesulfobacterium</i>     | 12 | 8   | 0.0019 | 0.0017 | 0.0018 |
| <i>Thiomonas</i>                  | 12 | 3   | 0.0019 | 0.0006 | 0.0013 |
| <i>Variovorax</i>                 | 12 | 55  | 0.0019 | 0.0115 | 0.0067 |
| <i>Bartonella</i>                 | 11 | 13  | 0.0018 | 0.0027 | 0.0022 |
| <i>Brenneria</i>                  | 11 | 6   | 0.0018 | 0.0013 | 0.0015 |
| <i>Candidatus Methyloirabilis</i> | 11 | 9   | 0.0018 | 0.0019 | 0.0018 |
| <i>Isoptericola</i>               | 11 | 10  | 0.0018 | 0.0021 | 0.0019 |
| <i>Methylobacter</i>              | 11 | 18  | 0.0018 | 0.0038 | 0.0028 |
| <i>Methylococcus</i>              | 11 | 5   | 0.0018 | 0.0010 | 0.0014 |
| <i>Methylovorus</i>               | 11 | 10  | 0.0018 | 0.0021 | 0.0019 |
| <i>Microhynatus</i>               | 11 | 20  | 0.0018 | 0.0042 | 0.0030 |
| <i>Nitratiruptor</i>              | 11 | 5   | 0.0018 | 0.0010 | 0.0014 |
| <i>Parvibaculum</i>               | 11 | 7   | 0.0018 | 0.0015 | 0.0016 |
| <i>Prochlorococcus</i>            | 11 | 28  | 0.0018 | 0.0058 | 0.0038 |
| <i>Thermodesulfobium</i>          | 11 | 3   | 0.0018 | 0.0006 | 0.0012 |
| <i>Thiorhodococcus</i>            | 11 | 6   | 0.0018 | 0.0013 | 0.0015 |
| <i>Alishewanella</i>              | 10 | 17  | 0.0016 | 0.0035 | 0.0026 |
| <i>Azorhizobium</i>               | 10 | 6   | 0.0016 | 0.0013 | 0.0014 |



|                               |    |    |        |        |        |
|-------------------------------|----|----|--------|--------|--------|
| <i>Azospira</i>               | 10 | 5  | 0.0016 | 0.0010 | 0.0013 |
| <i>Brevibacterium</i>         | 10 | 10 | 0.0016 | 0.0021 | 0.0018 |
| <i>Candidatus Phytoplasma</i> | 10 | 21 | 0.0016 | 0.0044 | 0.0030 |
| <i>Catenulispora</i>          | 10 | 24 | 0.0016 | 0.0050 | 0.0033 |
| <i>Chelativorans</i>          | 10 | 8  | 0.0016 | 0.0017 | 0.0016 |
| <i>Cronobacter</i>            | 10 | 14 | 0.0016 | 0.0029 | 0.0023 |
| <i>Erwinia</i>                | 10 | 19 | 0.0016 | 0.0040 | 0.0028 |
| <i>Hyphomicrobium</i>         | 10 | 4  | 0.0016 | 0.0008 | 0.0012 |
| <i>Intrasporangium</i>        | 10 | 6  | 0.0016 | 0.0013 | 0.0014 |
| <i>Kribbella</i>              | 10 | 28 | 0.0016 | 0.0058 | 0.0037 |
| <i>Lawsonia</i>               | 10 | 8  | 0.0016 | 0.0017 | 0.0016 |
| <i>Mesoplasma</i>             | 10 | 6  | 0.0016 | 0.0013 | 0.0014 |
| <i>Neptuniibacter</i>         | 10 | 6  | 0.0016 | 0.0013 | 0.0014 |
| <i>Parachlamydia</i>          | 10 | 5  | 0.0016 | 0.0010 | 0.0013 |
| <i>Prosthecochloris</i>       | 10 | 10 | 0.0016 | 0.0021 | 0.0018 |
| <i>Roseibium</i>              | 10 | 10 | 0.0016 | 0.0021 | 0.0018 |
| <i>Simkania</i>               | 10 | 1  | 0.0016 | 0.0002 | 0.0009 |
| <i>Sulfuricurvum</i>          | 10 | 6  | 0.0016 | 0.0013 | 0.0014 |
| <i>Thiocystis</i>             | 10 | 12 | 0.0016 | 0.0025 | 0.0020 |
| <i>Verrucosispora</i>         | 10 | 10 | 0.0016 | 0.0021 | 0.0018 |
| <i>Xylanimonas</i>            | 10 | 10 | 0.0016 | 0.0021 | 0.0018 |
| <i>Acidiphilium</i>           | 9  | 5  | 0.0014 | 0.0010 | 0.0012 |
| <i>Anabaena</i>               | 9  | 11 | 0.0014 | 0.0023 | 0.0019 |
| <i>Arsenophonus</i>           | 9  | 12 | 0.0014 | 0.0025 | 0.0020 |
| <i>Collimonas</i>             | 9  | 4  | 0.0014 | 0.0008 | 0.0011 |
| <i>Delftia</i>                | 9  | 5  | 0.0014 | 0.0010 | 0.0012 |
| <i>Herbaspirillum</i>         | 9  | 24 | 0.0014 | 0.0050 | 0.0032 |
| <i>Janthinobacterium</i>      | 9  | 4  | 0.0014 | 0.0008 | 0.0011 |
| <i>Laribacter</i>             | 9  | 10 | 0.0014 | 0.0021 | 0.0018 |
| <i>Methylotenera</i>          | 9  | 9  | 0.0014 | 0.0019 | 0.0017 |
| <i>Micrococcus</i>            | 9  | 4  | 0.0014 | 0.0008 | 0.0011 |
| <i>Nakamurella</i>            | 9  | 10 | 0.0014 | 0.0021 | 0.0018 |
| <i>Nocardia</i>               | 9  | 27 | 0.0014 | 0.0056 | 0.0035 |
| <i>Paracoccus</i>             | 9  | 36 | 0.0014 | 0.0075 | 0.0045 |
| <i>Patulibacter</i>           | 9  | 10 | 0.0014 | 0.0021 | 0.0018 |
| <i>Phenylobacterium</i>       | 9  | 8  | 0.0014 | 0.0017 | 0.0016 |
| <i>Pusillimonas</i>           | 9  | 2  | 0.0014 | 0.0004 | 0.0009 |
| <i>Raphidiopsis</i>           | 9  | 5  | 0.0014 | 0.0010 | 0.0012 |
| <i>Sideroxydans</i>           | 9  | 5  | 0.0014 | 0.0010 | 0.0012 |
| <i>Sulfurovum</i>             | 9  | 9  | 0.0014 | 0.0019 | 0.0017 |
| <i>Synechocystis</i>          | 9  | 4  | 0.0014 | 0.0008 | 0.0011 |
| <i>Thermosynechococcus</i>    | 9  | 11 | 0.0014 | 0.0023 | 0.0019 |
| <i>Tistrella</i>              | 9  | 33 | 0.0014 | 0.0069 | 0.0042 |
| <i>Wolbachia</i>              | 9  | 12 | 0.0014 | 0.0025 | 0.0020 |
| <i>Xanthobacter</i>           | 9  | 7  | 0.0014 | 0.0015 | 0.0014 |
| <i>Zymomonas</i>              | 9  | 9  | 0.0014 | 0.0019 | 0.0017 |
| <i>Acidobacterium</i>         | 8  | 6  | 0.0013 | 0.0013 | 0.0013 |

|                                    |   |    |        |        |        |
|------------------------------------|---|----|--------|--------|--------|
| <i>Actinosynnema</i>               | 8 | 12 | 0.0013 | 0.0025 | 0.0019 |
| <i>Candidatus Pelagibacter</i>     | 8 | 9  | 0.0013 | 0.0019 | 0.0016 |
| <i>Citreicella</i>                 | 8 | 8  | 0.0013 | 0.0017 | 0.0015 |
| <i>Hydrogenobaculum</i>            | 8 | 4  | 0.0013 | 0.0008 | 0.0011 |
| <i>Jonesia</i>                     | 8 | 5  | 0.0013 | 0.0010 | 0.0012 |
| <i>Kitasatospora</i>               | 8 | 7  | 0.0013 | 0.0015 | 0.0014 |
| <i>Marichromatium</i>              | 8 | 3  | 0.0013 | 0.0006 | 0.0010 |
| <i>Nitrobacter</i>                 | 8 | 10 | 0.0013 | 0.0021 | 0.0017 |
| <i>Oceanithermus</i>               | 8 | 4  | 0.0013 | 0.0008 | 0.0011 |
| <i>Pseudobutyrvibrio</i>           | 8 | 4  | 0.0013 | 0.0008 | 0.0011 |
| <i>Ramlibacter</i>                 | 8 | 4  | 0.0013 | 0.0008 | 0.0011 |
| <i>Stackebrandtia</i>              | 8 | 4  | 0.0013 | 0.0008 | 0.0011 |
| <i>Thioalkalimicrobium</i>         | 8 | 15 | 0.0013 | 0.0031 | 0.0022 |
| <i>Alkalilimnicola</i>             | 7 | 8  | 0.0011 | 0.0017 | 0.0014 |
| <i>Bordetella</i>                  | 7 | 13 | 0.0011 | 0.0027 | 0.0019 |
| <i>Cardiobacterium</i>             | 7 | 22 | 0.0011 | 0.0046 | 0.0029 |
| <i>Comamonas</i>                   | 7 | 5  | 0.0011 | 0.0010 | 0.0011 |
| <i>Ectothiorhodospira</i>          | 7 | 2  | 0.0011 | 0.0004 | 0.0008 |
| <i>Gallionella</i>                 | 7 | 3  | 0.0011 | 0.0006 | 0.0009 |
| <i>Geodermatophilus</i>            | 7 | 14 | 0.0011 | 0.0029 | 0.0020 |
| <i>Hydrogenobacter</i>             | 7 | 3  | 0.0011 | 0.0006 | 0.0009 |
| <i>Lautropia</i>                   | 7 | 5  | 0.0011 | 0.0010 | 0.0011 |
| <i>Mariprofundus</i>               | 7 | 2  | 0.0011 | 0.0004 | 0.0008 |
| <i>Orientia</i>                    | 7 | 9  | 0.0011 | 0.0019 | 0.0015 |
| <i>Pseudogulbenkiania</i>          | 7 | 6  | 0.0011 | 0.0013 | 0.0012 |
| <i>Renibacterium</i>               | 7 | 3  | 0.0011 | 0.0006 | 0.0009 |
| <i>Sulfurospirillum</i>            | 7 | 2  | 0.0011 | 0.0004 | 0.0008 |
| <i>Thermomonospora</i>             | 7 | 10 | 0.0011 | 0.0021 | 0.0016 |
| <i>Aeribacillus</i>                | 6 | 6  | 0.0010 | 0.0013 | 0.0011 |
| <i>Afipia</i>                      | 6 | 3  | 0.0010 | 0.0006 | 0.0008 |
| <i>Albidiferax</i>                 | 6 | 4  | 0.0010 | 0.0008 | 0.0009 |
| <i>Alcanivorax</i>                 | 6 | 4  | 0.0010 | 0.0008 | 0.0009 |
| <i>Amycolatopsis</i>               | 6 | 39 | 0.0010 | 0.0081 | 0.0045 |
| <i>Aneurinibacillus</i>            | 6 | 2  | 0.0010 | 0.0004 | 0.0007 |
| <i>Blastococcus</i>                | 6 | 15 | 0.0010 | 0.0031 | 0.0020 |
| <i>Candidatus Accumulibacter</i>   | 6 | 6  | 0.0010 | 0.0013 | 0.0011 |
| <i>Candidatus Midichloria</i>      | 6 | 2  | 0.0010 | 0.0004 | 0.0007 |
| <i>Candidatus Odysella</i>         | 6 | 15 | 0.0010 | 0.0031 | 0.0020 |
| <i>Candidatus Puniceispirillum</i> | 6 | 9  | 0.0010 | 0.0019 | 0.0014 |
| <i>Commensalibacter</i>            | 6 | 9  | 0.0010 | 0.0019 | 0.0014 |
| <i>Congregibacter</i>              | 6 | 6  | 0.0010 | 0.0013 | 0.0011 |
| <i>Curvibacter</i>                 | 6 | 1  | 0.0010 | 0.0002 | 0.0006 |
| <i>Dinoroseobacter</i>             | 6 | 5  | 0.0010 | 0.0010 | 0.0010 |
| <i>Janibacter</i>                  | 6 | 8  | 0.0010 | 0.0017 | 0.0013 |
| <i>Kangiella</i>                   | 6 | 5  | 0.0010 | 0.0010 | 0.0010 |
| <i>Methylobacillus</i>             | 6 | 1  | 0.0010 | 0.0002 | 0.0006 |
| <i>Methylocystis</i>               | 6 | 10 | 0.0010 | 0.0021 | 0.0015 |

|                                  |   |    |        |        |        |
|----------------------------------|---|----|--------|--------|--------|
| <i>Methylosinus</i>              | 6 | 2  | 0.0010 | 0.0004 | 0.0007 |
| <i>Mobilicoccus</i>              | 6 | 6  | 0.0010 | 0.0013 | 0.0011 |
| <i>Roseovarius</i>               | 6 | 17 | 0.0010 | 0.0035 | 0.0023 |
| <i>Starkeya</i>                  | 6 | 1  | 0.0010 | 0.0002 | 0.0006 |
| <i>Thiobacillus</i>              | 6 | 3  | 0.0010 | 0.0006 | 0.0008 |
| <i>Thiorhodospira</i>            | 6 | 8  | 0.0010 | 0.0017 | 0.0013 |
| <i>BD1-7 clade</i>               | 5 | 4  | 0.0008 | 0.0008 | 0.0008 |
| <i>Buchnera</i>                  | 5 | 6  | 0.0008 | 0.0013 | 0.0010 |
| <i>Candidatus Protochlamydia</i> | 5 | 5  | 0.0008 | 0.0010 | 0.0009 |
| <i>Chlamydia</i>                 | 5 | 3  | 0.0008 | 0.0006 | 0.0007 |
| <i>Chromohalobacter</i>          | 5 | 7  | 0.0008 | 0.0015 | 0.0011 |
| <i>Dichelobacter</i>             | 5 | 7  | 0.0008 | 0.0015 | 0.0011 |
| <i>Halorhodospira</i>            | 5 | 4  | 0.0008 | 0.0008 | 0.0008 |
| <i>Leptothrix</i>                | 5 | 2  | 0.0008 | 0.0004 | 0.0006 |
| <i>Marinithermus</i>             | 5 | 7  | 0.0008 | 0.0015 | 0.0011 |
| <i>Nitrococcus</i>               | 5 | 2  | 0.0008 | 0.0004 | 0.0006 |
| <i>Rhodomicrobium</i>            | 5 | 5  | 0.0008 | 0.0010 | 0.0009 |
| <i>Salinispora</i>               | 5 | 70 | 0.0008 | 0.0146 | 0.0077 |
| <i>Serinicoccus</i>              | 5 | 7  | 0.0008 | 0.0015 | 0.0011 |
| <i>Sodalis</i>                   | 5 | 9  | 0.0008 | 0.0019 | 0.0013 |
| <i>Ureaplasma</i>                | 5 | 2  | 0.0008 | 0.0004 | 0.0006 |
| <i>Wolinella</i>                 | 5 | 3  | 0.0008 | 0.0006 | 0.0007 |
| <i>Acidothermus</i>              | 4 | 6  | 0.0006 | 0.0013 | 0.0009 |
| <i>Aeromicrobium</i>             | 4 | 4  | 0.0006 | 0.0008 | 0.0007 |
| <i>Azotobacter</i>               | 4 | 5  | 0.0006 | 0.0010 | 0.0008 |
| <i>Belliella</i>                 | 4 | 54 | 0.0006 | 0.0113 | 0.0060 |
| <i>Blattabacterium</i>           | 4 | 6  | 0.0006 | 0.0013 | 0.0009 |
| <i>Candidatus Aquiluna</i>       | 4 | 3  | 0.0006 | 0.0006 | 0.0006 |
| <i>Cylindrospermopsis</i>        | 4 | 5  | 0.0006 | 0.0010 | 0.0008 |
| <i>Dechloromonas</i>             | 4 | 7  | 0.0006 | 0.0015 | 0.0010 |
| <i>Enhydrobacter</i>             | 4 | 2  | 0.0006 | 0.0004 | 0.0005 |
| <i>Granulibacter</i>             | 4 | 7  | 0.0006 | 0.0015 | 0.0010 |
| <i>Halothiobacillus</i>          | 4 | 4  | 0.0006 | 0.0008 | 0.0007 |
| <i>Hoeflea</i>                   | 4 | 3  | 0.0006 | 0.0006 | 0.0006 |
| <i>Hylemonella</i>               | 4 | 3  | 0.0006 | 0.0006 | 0.0006 |
| <i>Jannaschia</i>                | 4 | 6  | 0.0006 | 0.0013 | 0.0009 |
| <i>Kurthia</i>                   | 4 | 64 | 0.0006 | 0.0134 | 0.0070 |
| <i>Kytococcus</i>                | 4 | 3  | 0.0006 | 0.0006 | 0.0006 |
| <i>Leifsonia</i>                 | 4 | 7  | 0.0006 | 0.0015 | 0.0010 |
| <i>Maricaulis</i>                | 4 | 2  | 0.0006 | 0.0004 | 0.0005 |
| <i>Modestobacter</i>             | 4 | 14 | 0.0006 | 0.0029 | 0.0018 |
| <i>Morganella</i>                | 4 | 12 | 0.0006 | 0.0025 | 0.0016 |
| <i>Nodularia</i>                 | 4 | 4  | 0.0006 | 0.0008 | 0.0007 |
| <i>Ornithobacterium</i>          | 4 | 78 | 0.0006 | 0.0163 | 0.0085 |
| <i>Parvularcula</i>              | 4 | 11 | 0.0006 | 0.0023 | 0.0015 |
| <i>Rahnella</i>                  | 4 | 11 | 0.0006 | 0.0023 | 0.0015 |
| <i>Salinisphaera</i>             | 4 | 6  | 0.0006 | 0.0013 | 0.0009 |

|                                |   |     |        |        |        |
|--------------------------------|---|-----|--------|--------|--------|
| <i>Sulfitobacter</i>           | 4 | 4   | 0.0006 | 0.0008 | 0.0007 |
| <i>Thiomicrospira</i>          | 4 | 8   | 0.0006 | 0.0017 | 0.0012 |
| <i>Xylella</i>                 | 4 | 18  | 0.0006 | 0.0038 | 0.0022 |
| <i>Advenella</i>               | 3 | 1   | 0.0005 | 0.0002 | 0.0003 |
| <i>Aequorivita</i>             | 3 | 55  | 0.0005 | 0.0115 | 0.0060 |
| <i>Anaeroplasm</i>             | 3 | 1   | 0.0005 | 0.0002 | 0.0003 |
| <i>Beijerinckia</i>            | 3 | 4   | 0.0005 | 0.0008 | 0.0007 |
| <i>Citricoccus</i>             | 3 | 21  | 0.0005 | 0.0044 | 0.0024 |
| <i>Cyanobium</i>               | 3 | 2   | 0.0005 | 0.0004 | 0.0004 |
| <i>Dietzia</i>                 | 3 | 2   | 0.0005 | 0.0004 | 0.0004 |
| <i>Flexibacter</i>             | 3 | 123 | 0.0005 | 0.0257 | 0.0131 |
| <i>Fructobacillus</i>          | 3 | 5   | 0.0005 | 0.0010 | 0.0008 |
| <i>Indibacter</i>              | 3 | 80  | 0.0005 | 0.0167 | 0.0086 |
| <i>Joostella</i>               | 3 | 49  | 0.0005 | 0.0102 | 0.0054 |
| <i>Maritimibacter</i>          | 3 | 3   | 0.0005 | 0.0006 | 0.0006 |
| <i>Oceanibulbus</i>            | 3 | 1   | 0.0005 | 0.0002 | 0.0003 |
| <i>Oceanicaulis</i>            | 3 | 2   | 0.0005 | 0.0004 | 0.0004 |
| <i>OM43 clade</i>              | 3 | 2   | 0.0005 | 0.0004 | 0.0004 |
| <i>Segniliparus</i>            | 3 | 2   | 0.0005 | 0.0004 | 0.0004 |
| <i>Thermobispora</i>           | 3 | 18  | 0.0005 | 0.0038 | 0.0021 |
| <i>Tsukamurella</i>            | 3 | 6   | 0.0005 | 0.0013 | 0.0009 |
| <i>Wigglesworthia</i>          | 3 | 1   | 0.0005 | 0.0002 | 0.0003 |
| <i>Allochromatium</i>          | 2 | 5   | 0.0003 | 0.0010 | 0.0007 |
| <i>Aquimarina</i>              | 2 | 29  | 0.0003 | 0.0061 | 0.0032 |
| <i>Candidatus Ishikawaella</i> | 2 | 1   | 0.0003 | 0.0002 | 0.0003 |
| <i>Clavibacter</i>             | 2 | 15  | 0.0003 | 0.0031 | 0.0017 |
| <i>Emticicia</i>               | 2 | 79  | 0.0003 | 0.0165 | 0.0084 |
| <i>Fibrisoma</i>               | 2 | 93  | 0.0003 | 0.0194 | 0.0099 |
| <i>Frateuria</i>               | 2 | 2   | 0.0003 | 0.0004 | 0.0004 |
| <i>Ketogulonicigenium</i>      | 2 | 7   | 0.0003 | 0.0015 | 0.0009 |
| <i>Nautilia</i>                | 2 | 4   | 0.0003 | 0.0008 | 0.0006 |
| <i>Nitritalea</i>              | 2 | 19  | 0.0003 | 0.0040 | 0.0021 |
| <i>Nitrolancetus</i>           | 2 | 17  | 0.0003 | 0.0035 | 0.0019 |
| <i>Phyllobacterium</i>         | 2 | 4   | 0.0003 | 0.0008 | 0.0006 |
| <i>Propionigenium</i>          | 2 | 1   | 0.0003 | 0.0002 | 0.0003 |
| <i>Sagittula</i>               | 2 | 5   | 0.0003 | 0.0010 | 0.0007 |
| <i>Thermoactinomyces</i>       | 2 | 1   | 0.0003 | 0.0002 | 0.0003 |
| <i>Thiothrix</i>               | 2 | 18  | 0.0003 | 0.0038 | 0.0020 |
| <i>Waddlia</i>                 | 2 | 3   | 0.0003 | 0.0006 | 0.0005 |
| <i>Acidimicrobium</i>          | 1 | 7   | 0.0002 | 0.0015 | 0.0008 |
| <i>Ahrensia</i>                | 1 | 3   | 0.0002 | 0.0006 | 0.0004 |
| <i>Anaplasma</i>               | 1 | 1   | 0.0002 | 0.0002 | 0.0002 |
| <i>Aurantimonas</i>            | 1 | 19  | 0.0002 | 0.0040 | 0.0021 |
| <i>Candidatus Blochmannia</i>  | 1 | 2   | 0.0002 | 0.0004 | 0.0003 |
| <i>Candidatus Carsonella</i>   | 1 | 3   | 0.0002 | 0.0006 | 0.0004 |
| <i>Candidatus Moranella</i>    | 1 | 1   | 0.0002 | 0.0002 | 0.0002 |
| <i>Candidatus Riesia</i>       | 1 | 1   | 0.0002 | 0.0002 | 0.0002 |

|                                           |              |              |               |               |               |
|-------------------------------------------|--------------|--------------|---------------|---------------|---------------|
| <i>Candidatus Ruthia magnifica</i>        | 1            | 3            | 0.0002        | 0.0006        | 0.0004        |
| <i>Candidatus Sulcia</i>                  | 1            | 8            | 0.0002        | 0.0017        | 0.0009        |
| <i>Caryophanon</i>                        | 1            | 2            | 0.0002        | 0.0004        | 0.0003        |
| <i>Chlamydophila</i>                      | 1            | 2            | 0.0002        | 0.0004        | 0.0003        |
| <i>Chondromyces</i>                       | 1            | 13           | 0.0002        | 0.0027        | 0.0014        |
| <i>Cystobacter</i>                        | 1            | 8            | 0.0002        | 0.0017        | 0.0009        |
| <i>Desulfomonile</i>                      | 1            | 26           | 0.0002        | 0.0054        | 0.0028        |
| <i>Fulvimarina</i>                        | 1            | 33           | 0.0002        | 0.0069        | 0.0035        |
| <i>Hydrogenophaga</i>                     | 1            | 10           | 0.0002        | 0.0021        | 0.0011        |
| <i>Leucobacter</i>                        | 1            | 12           | 0.0002        | 0.0025        | 0.0013        |
| <i>Loktanella</i>                         | 1            | 2            | 0.0002        | 0.0004        | 0.0003        |
| <i>Prolixibacter</i>                      | 1            | 1            | 0.0002        | 0.0002        | 0.0002        |
| <i>Ruminobacter</i>                       | 1            | 1            | 0.0002        | 0.0002        | 0.0002        |
| <i>Salinibacterium</i>                    | 1            | 8            | 0.0002        | 0.0017        | 0.0009        |
| <i>Syntrophococcus</i>                    | 1            | 3            | 0.0002        | 0.0006        | 0.0004        |
| <i>Thalassobium</i>                       | 1            | 1            | 0.0002        | 0.0002        | 0.0002        |
| <i>Thermocrinis</i>                       | 1            | 3            | 0.0002        | 0.0006        | 0.0004        |
| <i>Turicella</i>                          | 1            | 5            | 0.0002        | 0.0010        | 0.0006        |
| <b>Unclassified Clostridiales</b>         | <b>13629</b> | <b>5046</b>  | <b>2.1706</b> | <b>1.0530</b> | <b>1.6118</b> |
| <b>Unclassified Lachnospiraceae</b>       | <b>17402</b> | <b>8669</b>  | <b>2.7715</b> | <b>1.8091</b> | <b>2.2903</b> |
| <b>unclassified Ruminococcaceae</b>       | <b>3285</b>  | <b>1479</b>  | <b>0.5232</b> | <b>0.3086</b> | <b>0.4159</b> |
| <b>Unclassified Succinivibrionaceae</b>   | <b>2204</b>  | <b>886</b>   | <b>0.3510</b> | <b>0.1849</b> | <b>0.2680</b> |
| <b>Unclassified Erysipelotrichaceae</b>   | <b>1825</b>  | <b>966</b>   | <b>0.2907</b> | <b>0.2016</b> | <b>0.2461</b> |
| <b>Unclassified Peptostreptococcaceae</b> | <b>773</b>   | <b>548</b>   | <b>0.1231</b> | <b>0.1144</b> | <b>0.1187</b> |
| <hr/>                                     |              |              |               |               |               |
| Archaea                                   |              |              |               |               |               |
| <b><i>Methanobrevibacter</i></b>          | <b>17078</b> | <b>12489</b> | <b>2.7199</b> | <b>2.6062</b> | <b>2.6631</b> |
| <b><i>Methanosphaera</i></b>              | <b>1715</b>  | <b>875</b>   | <b>0.2731</b> | <b>0.1826</b> | <b>0.2279</b> |
| <i>Methanobacterium</i>                   | 293          | 272          | 0.0467        | 0.0568        | 0.0517        |
| <i>Methanosarcina</i>                     | 191          | 141          | 0.0304        | 0.0294        | 0.0299        |
| <i>Methanothermobacter</i>                | 173          | 130          | 0.0276        | 0.0271        | 0.0273        |
| <i>Aciduliprofundum</i>                   | 129          | 45           | 0.0205        | 0.0094        | 0.0150        |
| <i>Methanocorpusculum</i>                 | 95           | 30           | 0.0151        | 0.0063        | 0.0107        |
| <i>Methanocella</i>                       | 77           | 47           | 0.0123        | 0.0098        | 0.0110        |
| <i>Methanococcus</i>                      | 73           | 39           | 0.0116        | 0.0081        | 0.0099        |
| <i>Thermococcus</i>                       | 73           | 50           | 0.0116        | 0.0104        | 0.0110        |
| <i>Methanocaldococcus</i>                 | 63           | 20           | 0.0100        | 0.0042        | 0.0071        |
| <i>Methanoplanus</i>                      | 54           | 40           | 0.0086        | 0.0083        | 0.0085        |
| <i>Methanosaeta</i>                       | 51           | 25           | 0.0081        | 0.0052        | 0.0067        |
| <i>Methanosalsum</i>                      | 51           | 27           | 0.0081        | 0.0056        | 0.0069        |
| <i>Archaeoglobus</i>                      | 48           | 17           | 0.0076        | 0.0035        | 0.0056        |
| <i>Methanothermus</i>                     | 45           | 52           | 0.0072        | 0.0109        | 0.0090        |
| <i>Methanopyrus</i>                       | 39           | 29           | 0.0062        | 0.0061        | 0.0061        |
| <i>Methanospirillum</i>                   | 38           | 6            | 0.0061        | 0.0013        | 0.0037        |
| <i>Pyrococcus</i>                         | 33           | 12           | 0.0053        | 0.0025        | 0.0039        |
| <i>Methanococcoides</i>                   | 29           | 27           | 0.0046        | 0.0056        | 0.0051        |
| <i>Methanohalophilus</i>                  | 24           | 9            | 0.0038        | 0.0019        | 0.0029        |
| <i>Methanohalobium</i>                    | 22           | 17           | 0.0035        | 0.0035        | 0.0035        |

|                                   |             |             |               |               |               |
|-----------------------------------|-------------|-------------|---------------|---------------|---------------|
| <i>Methanotorris</i>              | 22          | 23          | 0.0035        | 0.0048        | 0.0042        |
| <i>Thermoplasma</i>               | 22          | 11          | 0.0035        | 0.0023        | 0.0029        |
| <i>Methanosphaerula</i>           | 21          | 10          | 0.0033        | 0.0021        | 0.0027        |
| <i>Methanoregula</i>              | 20          | 17          | 0.0032        | 0.0035        | 0.0034        |
| <i>Methanoculleus</i>             | 19          | 23          | 0.0030        | 0.0048        | 0.0039        |
| <i>Halorhabdus</i>                | 16          | 19          | 0.0025        | 0.0040        | 0.0033        |
| <i>Pyrobaculum</i>                | 16          | 4           | 0.0025        | 0.0008        | 0.0017        |
| <i>Ferroplasma</i>                | 12          | 3           | 0.0019        | 0.0006        | 0.0013        |
| <i>Methanolinea</i>               | 12          | 1           | 0.0019        | 0.0002        | 0.0011        |
| <i>Sulfolobus</i>                 | 11          | 10          | 0.0018        | 0.0021        | 0.0019        |
| <i>Desulfurococcus</i>            | 9           | 2           | 0.0014        | 0.0004        | 0.0009        |
| <i>Haloarcula</i>                 | 9           | 4           | 0.0014        | 0.0008        | 0.0011        |
| <i>Picrophilus</i>                | 9           | 6           | 0.0014        | 0.0013        | 0.0013        |
| <i>Thermofilum</i>                | 9           | 3           | 0.0014        | 0.0006        | 0.0010        |
| <i>Methanothermococcus</i>        | 8           | 12          | 0.0013        | 0.0025        | 0.0019        |
| <i>Ferroglobus</i>                | 7           | 6           | 0.0011        | 0.0013        | 0.0012        |
| <i>Haloterrigena</i>              | 7           | 3           | 0.0011        | 0.0006        | 0.0009        |
| <i>Thermoproteus</i>              | 7           | 2           | 0.0011        | 0.0004        | 0.0008        |
| <i>Candidatus Nitrosoarchaeum</i> | 5           | 5           | 0.0008        | 0.0010        | 0.0009        |
| <i>Halorubrum</i>                 | 5           | 3           | 0.0008        | 0.0006        | 0.0007        |
| <i>Metallosphaera</i>             | 5           | 1           | 0.0008        | 0.0002        | 0.0005        |
| <i>Staphylothermus</i>            | 5           | 2           | 0.0008        | 0.0004        | 0.0006        |
| <i>Candidatus Korarchaeum</i>     | 4           | 2           | 0.0006        | 0.0004        | 0.0005        |
| <i>Halobiforma</i>                | 4           | 6           | 0.0006        | 0.0013        | 0.0009        |
| <i>Haloferax</i>                  | 4           | 9           | 0.0006        | 0.0019        | 0.0013        |
| <i>Natronobacterium</i>           | 4           | 1           | 0.0006        | 0.0002        | 0.0004        |
| <i>Natronomonas</i>               | 4           | 1           | 0.0006        | 0.0002        | 0.0004        |
| <i>Nitrosopumilus</i>             | 4           | 8           | 0.0006        | 0.0017        | 0.0012        |
| <i>Candidatus Caldiarchaeum</i>   | 3           | 2           | 0.0005        | 0.0004        | 0.0004        |
| <i>Haladaptatus</i>               | 3           | 2           | 0.0005        | 0.0004        | 0.0004        |
| <i>Halomicrobium</i>              | 3           | 2           | 0.0005        | 0.0004        | 0.0004        |
| <i>Haloquadratum</i>              | 3           | 11          | 0.0005        | 0.0023        | 0.0014        |
| <i>Natrialba</i>                  | 3           | 4           | 0.0005        | 0.0008        | 0.0007        |
| <i>Natrinema</i>                  | 3           | 2           | 0.0005        | 0.0004        | 0.0004        |
| <i>Pyrolobus</i>                  | 3           | 1           | 0.0005        | 0.0002        | 0.0003        |
| <i>Acidilobus</i>                 | 2           | 2           | 0.0003        | 0.0004        | 0.0004        |
| <i>Candidatus Parvarchaeum</i>    | 2           | 1           | 0.0003        | 0.0002        | 0.0003        |
| <i>Halopiger</i>                  | 2           | 1           | 0.0003        | 0.0002        | 0.0003        |
| <i>Ignisphaera</i>                | 2           | 4           | 0.0003        | 0.0008        | 0.0006        |
| <i>Thermogladius</i>              | 2           | 1           | 0.0003        | 0.0002        | 0.0003        |
| <i>Vulcanisaeta</i>               | 2           | 1           | 0.0003        | 0.0002        | 0.0003        |
| <i>Halobacterium</i>              | 1           | 6           | 0.0002        | 0.0013        | 0.0007        |
| <i>Ignicoccus</i>                 | 1           | 2           | 0.0002        | 0.0004        | 0.0003        |
| <hr/>                             |             |             |               |               |               |
| Protozoa                          |             |             |               |               |               |
| <b><i>Paramecium</i></b>          | <b>2848</b> | <b>2922</b> | <b>0.4536</b> | <b>0.6098</b> | <b>0.5317</b> |
| <b><i>Tetrahymena</i></b>         | <b>2218</b> | <b>3204</b> | <b>0.3533</b> | <b>0.6686</b> | <b>0.5109</b> |
| <b><i>Entodinium</i></b>          | <b>1954</b> | <b>2996</b> | <b>0.3112</b> | <b>0.6252</b> | <b>0.4682</b> |

|                           |             |             |               |               |               |
|---------------------------|-------------|-------------|---------------|---------------|---------------|
| <i>Ichthyophthirius</i>   | <b>1481</b> | <b>2054</b> | <b>0.2359</b> | <b>0.4286</b> | <b>0.3323</b> |
| <i>Entamoeba</i>          | <b>1216</b> | <b>2022</b> | <b>0.1937</b> | <b>0.4220</b> | <b>0.3078</b> |
| <i>Trichomonas</i>        | <b>818</b>  | <b>1116</b> | <b>0.1303</b> | <b>0.2329</b> | <b>0.1816</b> |
| <i>Perkinsus</i>          | 512         | 449         | 0.0815        | 0.0937        | 0.0876        |
| <i>Plasmodium</i>         | 512         | 908         | 0.0815        | 0.1895        | 0.1355        |
| <i>Dictyostelium</i>      | 487         | 1639        | 0.0776        | 0.3420        | 0.2098        |
| <i>Naegleria</i>          | 414         | 442         | 0.0659        | 0.0922        | 0.0791        |
| <i>Babesia</i>            | 384         | 717         | 0.0612        | 0.1496        | 0.1054        |
| <i>Polysphondylium</i>    | 222         | 446         | 0.0354        | 0.0931        | 0.0642        |
| <i>Spathidium</i>         | 185         | 294         | 0.0295        | 0.0614        | 0.0454        |
| <i>Blastocystis</i>       | 165         | 368         | 0.0263        | 0.0768        | 0.0515        |
| <i>Cryptosporidium</i>    | 163         | 304         | 0.0260        | 0.0634        | 0.0447        |
| <i>Oxytricha</i>          | 155         | 6783        | 0.0247        | 1.4155        | 0.7201        |
| <i>Toxoplasma</i>         | 153         | 355         | 0.0244        | 0.0741        | 0.0492        |
| <i>Trypanosoma</i>        | 152         | 277         | 0.0242        | 0.0578        | 0.0410        |
| <i>Capsaspora</i>         | 119         | 225         | 0.0190        | 0.0470        | 0.0330        |
| <i>Euplotes</i>           | 103         | 77          | 0.0164        | 0.0161        | 0.0162        |
| <i>Neospora</i>           | 102         | 358         | 0.0162        | 0.0747        | 0.0455        |
| <i>Monosiga</i>           | 88          | 322         | 0.0140        | 0.0672        | 0.0406        |
| <i>Giardia</i>            | 80          | 76          | 0.0127        | 0.0159        | 0.0143        |
| <i>Plasmodium berghei</i> | 80          | 91          | 0.0127        | 0.0190        | 0.0159        |
| <i>Nyctotherus</i>        | 78          | 60          | 0.0124        | 0.0125        | 0.0125        |
| <i>Sterkiella</i>         | 72          | 73          | 0.0115        | 0.0152        | 0.0134        |
| <i>Eudiplodinium</i>      | 68          | 164         | 0.0108        | 0.0342        | 0.0225        |
| <i>Epidinium</i>          | 66          | 168         | 0.0105        | 0.0351        | 0.0228        |
| <i>Leishmania</i>         | 64          | 404         | 0.0102        | 0.0843        | 0.0473        |
| <i>Eimeria</i>            | 64          | 64          | 0.0102        | 0.0134        | 0.0118        |
| <i>Theileria</i>          | 64          | 197         | 0.0102        | 0.0411        | 0.0257        |
| <i>Moneuplotes</i>        | 63          | 68          | 0.0100        | 0.0142        | 0.0121        |
| <i>Polyplastron</i>       | 61          | 70          | 0.0097        | 0.0146        | 0.0122        |
| <i>Pseudourostyla</i>     | 58          | 21          | 0.0092        | 0.0044        | 0.0068        |
| <i>Stylonychia</i>        | 40          | 38          | 0.0064        | 0.0079        | 0.0072        |
| <i>Metadinium</i>         | 38          | 14          | 0.0061        | 0.0029        | 0.0045        |
| <i>Chilodonella</i>       | 34          | 4           | 0.0054        | 0.0008        | 0.0031        |
| <i>Didinium</i>           | 25          | 21          | 0.0040        | 0.0044        | 0.0042        |
| <i>Dileptus</i>           | 25          | 13          | 0.0040        | 0.0027        | 0.0033        |
| <i>Physarum</i>           | 24          | 33          | 0.0038        | 0.0069        | 0.0054        |
| <i>Isotricha</i>          | 22          | 17          | 0.0035        | 0.0035        | 0.0035        |
| <i>Karlodinium</i>        | 21          | 8           | 0.0033        | 0.0017        | 0.0025        |
| <i>Dasytricha</i>         | 20          | 23          | 0.0032        | 0.0048        | 0.0040        |
| <i>Uroleptus</i>          | 18          | 22          | 0.0029        | 0.0046        | 0.0037        |
| <i>Mastigamoeba</i>       | 18          | 15          | 0.0029        | 0.0031        | 0.0030        |
| <i>Pfiesteria</i>         | 15          | 7           | 0.0024        | 0.0015        | 0.0019        |
| <i>Streblomastix</i>      | 12          | 29          | 0.0019        | 0.0061        | 0.0040        |
| <i>Arachnula</i>          | 10          | 47          | 0.0016        | 0.0098        | 0.0057        |
| <i>Monocercomonoides</i>  | 9           | 33          | 0.0014        | 0.0069        | 0.0042        |
| <i>Amphidinium</i>        | 9           | 15          | 0.0014        | 0.0031        | 0.0023        |

|                            |     |     |        |        |        |
|----------------------------|-----|-----|--------|--------|--------|
| <i>Heterocapsa</i>         | 8   | 12  | 0.0013 | 0.0025 | 0.0019 |
| <i>Acanthamoeba</i>        | 8   | 12  | 0.0013 | 0.0025 | 0.0019 |
| <i>Gymnophrys</i>          | 7   | 2   | 0.0011 | 0.0004 | 0.0008 |
| <i>Vermamoeba</i>          | 7   | 2   | 0.0011 | 0.0004 | 0.0008 |
| <i>Histomonas</i>          | 6   | 13  | 0.0010 | 0.0027 | 0.0018 |
| <i>Anophryoides</i>        | 5   | 3   | 0.0008 | 0.0006 | 0.0007 |
| <i>Chromera</i>            | 5   | 1   | 0.0008 | 0.0002 | 0.0005 |
| <i>Bodomorpha</i>          | 5   | 10  | 0.0008 | 0.0021 | 0.0014 |
| <i>Trichomitus</i>         | 4   | 1   | 0.0006 | 0.0002 | 0.0004 |
| <i>Sorogena</i>            | 4   | 42  | 0.0006 | 0.0088 | 0.0047 |
| <i>Telotrochidium</i>      | 4   | 8   | 0.0006 | 0.0017 | 0.0012 |
| <i>Acytostelium</i>        | 4   | 3   | 0.0006 | 0.0006 | 0.0006 |
| <i>Andalucia</i>           | 4   | 7   | 0.0006 | 0.0015 | 0.0010 |
| <i>Paulinella</i>          | 4   | 4   | 0.0006 | 0.0008 | 0.0007 |
| <i>Protoopalina</i>        | 4   | 5   | 0.0006 | 0.0010 | 0.0008 |
| <i>Blepharisma</i>         | 3   | 10  | 0.0005 | 0.0021 | 0.0013 |
| <i>Neoceratium</i>         | 3   | 1   | 0.0005 | 0.0002 | 0.0003 |
| <i>Uronema</i>             | 3   | 4   | 0.0005 | 0.0008 | 0.0007 |
| <i>Reclinomonas</i>        | 3   | 2   | 0.0005 | 0.0004 | 0.0004 |
| <i>Planomonas</i>          | 3   | 1   | 0.0005 | 0.0002 | 0.0003 |
| <i>Bodo</i>                | 2   | 5   | 0.0003 | 0.0010 | 0.0007 |
| <i>Tritrichomonas</i>      | 2   | 1   | 0.0003 | 0.0002 | 0.0003 |
| <i>Crypthecodinium</i>     | 2   | 3   | 0.0003 | 0.0006 | 0.0005 |
| <i>Eufolliculina</i>       | 2   | 7   | 0.0003 | 0.0015 | 0.0009 |
| <i>Miamiensis</i>          | 2   | 2   | 0.0003 | 0.0004 | 0.0004 |
| <i>Oxyrrhis</i>            | 2   | 4   | 0.0003 | 0.0008 | 0.0006 |
| <i>Prorocentrum</i>        | 2   | 5   | 0.0003 | 0.0010 | 0.0007 |
| <i>Symbiodinium</i>        | 2   | 1   | 0.0003 | 0.0002 | 0.0003 |
| <i>Arcyria</i>             | 2   | 4   | 0.0003 | 0.0008 | 0.0006 |
| <i>Thraustochytrium</i>    | 2   | 1   | 0.0003 | 0.0002 | 0.0003 |
| <i>Herpetomonas</i>        | 1   | 1   | 0.0002 | 0.0002 | 0.0002 |
| <i>Parabodo</i>            | 1   | 1   | 0.0002 | 0.0002 | 0.0002 |
| <i>Pseudocohnilembus</i>   | 1   | 1   | 0.0002 | 0.0002 | 0.0002 |
| <i>Allogromia</i>          | 1   | 1   | 0.0002 | 0.0002 | 0.0002 |
| <i>Cercomonas</i>          | 1   | 4   | 0.0002 | 0.0008 | 0.0005 |
| <i>Collozoum</i>           | 1   | 4   | 0.0002 | 0.0008 | 0.0005 |
| <i>Globobulimina</i>       | 1   | 3   | 0.0002 | 0.0006 | 0.0004 |
| <i>Gymnochloa</i>          | 1   | 6   | 0.0002 | 0.0013 | 0.0007 |
| <i>Rosalina</i>            | 1   | 2   | 0.0002 | 0.0004 | 0.0003 |
| <i>Aurantiochytrium</i>    | 1   | 1   | 0.0002 | 0.0002 | 0.0002 |
| <hr/>                      |     |     |        |        |        |
| Fungi                      |     |     |        |        |        |
| <i>Batrachochytrium</i>    | 383 | 207 | 0.0610 | 0.0432 | 0.0521 |
| <i>Rhizopus</i>            | 298 | 235 | 0.0475 | 0.0490 | 0.0483 |
| <i>Neocallimastix</i>      | 276 | 148 | 0.0440 | 0.0309 | 0.0374 |
| <i>Piromyces</i>           | 223 | 122 | 0.0355 | 0.0255 | 0.0305 |
| <i>Aspergillus</i>         | 113 | 116 | 0.0180 | 0.0242 | 0.0211 |
| <i>Schizosaccharomyces</i> | 90  | 117 | 0.0143 | 0.0244 | 0.0194 |



|                         |    |     |        |        |        |
|-------------------------|----|-----|--------|--------|--------|
| <i>Candida</i>          | 79 | 232 | 0.0126 | 0.0484 | 0.0305 |
| <i>Saccharomyces</i>    | 77 | 167 | 0.0123 | 0.0348 | 0.0236 |
| <i>Filobasidiella</i>   | 62 | 42  | 0.0099 | 0.0088 | 0.0093 |
| <i>Schizophyllum</i>    | 57 | 79  | 0.0091 | 0.0165 | 0.0128 |
| <i>Exophiala</i>        | 56 | 52  | 0.0089 | 0.0109 | 0.0099 |
| <i>Chaetomium</i>       | 54 | 54  | 0.0086 | 0.0113 | 0.0099 |
| <i>Coprinopsis</i>      | 54 | 58  | 0.0086 | 0.0121 | 0.0104 |
| <i>Orpinomyces</i>      | 50 | 30  | 0.0080 | 0.0063 | 0.0071 |
| <i>Serpula</i>          | 47 | 25  | 0.0075 | 0.0052 | 0.0064 |
| <i>Ogataea</i>          | 40 | 70  | 0.0064 | 0.0146 | 0.0105 |
| <i>Pyrenophora</i>      | 40 | 16  | 0.0064 | 0.0033 | 0.0049 |
| <i>Fusarium</i>         | 38 | 31  | 0.0061 | 0.0065 | 0.0063 |
| <i>Melampsora</i>       | 37 | 28  | 0.0059 | 0.0058 | 0.0059 |
| <i>Orbilia</i>          | 36 | 83  | 0.0057 | 0.0173 | 0.0115 |
| <i>Nectria</i>          | 35 | 31  | 0.0056 | 0.0065 | 0.0060 |
| <i>Sporisorium</i>      | 35 | 46  | 0.0056 | 0.0096 | 0.0076 |
| <i>Phaeosphaeria</i>    | 34 | 16  | 0.0054 | 0.0033 | 0.0044 |
| <i>Zymoseptoria</i>     | 33 | 23  | 0.0053 | 0.0048 | 0.0050 |
| <i>Piriformospora</i>   | 32 | 27  | 0.0051 | 0.0056 | 0.0054 |
| <i>Trichoderma</i>      | 32 | 104 | 0.0051 | 0.0217 | 0.0134 |
| <i>Enterocytozoon</i>   | 31 | 16  | 0.0049 | 0.0033 | 0.0041 |
| <i>Vanderwaltozyma</i>  | 30 | 52  | 0.0048 | 0.0109 | 0.0078 |
| <i>Paracoccidioides</i> | 28 | 57  | 0.0045 | 0.0119 | 0.0082 |
| <i>Spathaspora</i>      | 28 | 37  | 0.0045 | 0.0077 | 0.0061 |
| <i>Thielavia</i>        | 28 | 64  | 0.0045 | 0.0134 | 0.0089 |
| <i>Ajellomyces</i>      | 27 | 50  | 0.0043 | 0.0104 | 0.0074 |
| <i>Komagataella</i>     | 27 | 72  | 0.0043 | 0.0150 | 0.0097 |
| <i>Neurospora</i>       | 27 | 96  | 0.0043 | 0.0200 | 0.0122 |
| <i>Laccaria</i>         | 26 | 17  | 0.0041 | 0.0035 | 0.0038 |
| <i>Malassezia</i>       | 26 | 55  | 0.0041 | 0.0115 | 0.0078 |
| <i>Postia</i>           | 25 | 6   | 0.0040 | 0.0013 | 0.0026 |
| <i>Clavispora</i>       | 24 | 62  | 0.0038 | 0.0129 | 0.0084 |
| <i>Moniliophthora</i>   | 24 | 5   | 0.0038 | 0.0010 | 0.0024 |
| <i>Puccinia</i>         | 23 | 52  | 0.0037 | 0.0109 | 0.0073 |
| <i>Kazachstania</i>     | 22 | 81  | 0.0035 | 0.0169 | 0.0102 |
| <i>Debaryomyces</i>     | 21 | 10  | 0.0033 | 0.0021 | 0.0027 |
| <i>Kluyveromyces</i>    | 21 | 20  | 0.0033 | 0.0042 | 0.0038 |
| <i>Lodderomyces</i>     | 21 | 71  | 0.0033 | 0.0148 | 0.0091 |
| <i>Podospora</i>        | 21 | 18  | 0.0033 | 0.0038 | 0.0036 |
| <i>Tuber</i>            | 21 | 14  | 0.0033 | 0.0029 | 0.0031 |
| <i>Verticillium</i>     | 20 | 28  | 0.0032 | 0.0058 | 0.0045 |
| <i>Mixia</i>            | 20 | 28  | 0.0032 | 0.0058 | 0.0045 |
| <i>Tetrapisispora</i>   | 20 | 118 | 0.0032 | 0.0246 | 0.0139 |
| <i>Millerozyma</i>      | 19 | 35  | 0.0030 | 0.0073 | 0.0052 |
| <i>Naumovozya</i>       | 19 | 45  | 0.0030 | 0.0094 | 0.0062 |
| <i>Lachancea</i>        | 18 | 29  | 0.0029 | 0.0061 | 0.0045 |
| <i>Eremothecium</i>     | 17 | 34  | 0.0027 | 0.0071 | 0.0049 |

|                          |    |     |        |        |        |
|--------------------------|----|-----|--------|--------|--------|
| <i>Scheffersomyces</i>   | 17 | 41  | 0.0027 | 0.0086 | 0.0056 |
| <i>Yarrowia</i>          | 17 | 111 | 0.0027 | 0.0232 | 0.0129 |
| <i>Emericella</i>        | 16 | 41  | 0.0025 | 0.0086 | 0.0056 |
| <i>Metarhizium</i>       | 16 | 34  | 0.0025 | 0.0071 | 0.0048 |
| <i>Neosartorya</i>       | 16 | 24  | 0.0025 | 0.0050 | 0.0038 |
| <i>Botryotinia</i>       | 15 | 32  | 0.0024 | 0.0067 | 0.0045 |
| <i>Coccidioides</i>      | 15 | 22  | 0.0024 | 0.0046 | 0.0035 |
| <i>Nakaseomyces</i>      | 15 | 78  | 0.0024 | 0.0163 | 0.0093 |
| <i>Leptosphaeria</i>     | 14 | 60  | 0.0022 | 0.0125 | 0.0074 |
| <i>Meyerozyma</i>        | 14 | 41  | 0.0022 | 0.0086 | 0.0054 |
| <i>Ustilago</i>          | 14 | 41  | 0.0022 | 0.0086 | 0.0054 |
| <i>Arthroderma</i>       | 13 | 34  | 0.0021 | 0.0071 | 0.0046 |
| <i>Penicillium</i>       | 13 | 22  | 0.0021 | 0.0046 | 0.0033 |
| <i>Talaromyces</i>       | 13 | 49  | 0.0021 | 0.0102 | 0.0061 |
| <i>Colletotrichum</i>    | 12 | 22  | 0.0019 | 0.0046 | 0.0033 |
| <i>Nosema</i>            | 12 | 15  | 0.0019 | 0.0031 | 0.0025 |
| <i>Rhizophagus</i>       | 12 | 1   | 0.0019 | 0.0002 | 0.0011 |
| <i>Rhodotorula</i>       | 12 | 23  | 0.0019 | 0.0048 | 0.0034 |
| <i>Sordaria</i>          | 12 | 25  | 0.0019 | 0.0052 | 0.0036 |
| <i>Torulasporea</i>      | 12 | 22  | 0.0019 | 0.0046 | 0.0033 |
| <i>Sclerotinia</i>       | 11 | 19  | 0.0018 | 0.0040 | 0.0029 |
| <i>Alternaria</i>        | 11 | 5   | 0.0018 | 0.0010 | 0.0014 |
| <i>Catenaria</i>         | 11 | 9   | 0.0018 | 0.0019 | 0.0018 |
| <i>Grosmannia</i>        | 11 | 22  | 0.0018 | 0.0046 | 0.0032 |
| <i>Uncinocarpus</i>      | 11 | 4   | 0.0018 | 0.0008 | 0.0013 |
| <i>Cordyceps</i>         | 10 | 16  | 0.0016 | 0.0033 | 0.0025 |
| <i>Gonapodya</i>         | 9  | 8   | 0.0014 | 0.0017 | 0.0016 |
| <i>Zygosaccharomyces</i> | 9  | 27  | 0.0014 | 0.0056 | 0.0035 |
| <i>Magnaporthe</i>       | 8  | 23  | 0.0013 | 0.0048 | 0.0030 |
| <i>Myceliophthora</i>    | 8  | 25  | 0.0013 | 0.0052 | 0.0032 |
| <i>Glomerella</i>        | 7  | 16  | 0.0011 | 0.0033 | 0.0022 |
| <i>Trichophyton</i>      | 7  | 35  | 0.0011 | 0.0073 | 0.0042 |
| <i>Glarea</i>            | 6  | 5   | 0.0010 | 0.0010 | 0.0010 |
| <i>Blastocladiella</i>   | 5  | 6   | 0.0008 | 0.0013 | 0.0010 |
| <i>Edhazardia</i>        | 5  | 58  | 0.0008 | 0.0121 | 0.0064 |
| <i>Gigaspora</i>         | 5  | 1   | 0.0008 | 0.0002 | 0.0005 |
| <i>Beauveria</i>         | 4  | 25  | 0.0006 | 0.0052 | 0.0029 |
| <i>Encephalitozoon</i>   | 4  | 15  | 0.0006 | 0.0031 | 0.0019 |
| <i>Nematocida</i>        | 4  | 27  | 0.0006 | 0.0056 | 0.0031 |
| <i>Dactylellina</i>      | 3  | 3   | 0.0005 | 0.0006 | 0.0006 |
| <i>Dekkera</i>           | 3  | 29  | 0.0005 | 0.0061 | 0.0033 |
| <i>Tremella</i>          | 3  | 20  | 0.0005 | 0.0042 | 0.0023 |
| <i>Cyberlindnera</i>     | 2  | 1   | 0.0003 | 0.0002 | 0.0003 |
| <i>Coniothyrium</i>      | 2  | 2   | 0.0003 | 0.0004 | 0.0004 |
| <i>Auricularia</i>       | 2  | 35  | 0.0003 | 0.0073 | 0.0038 |
| <i>Fibroporia</i>        | 2  | 21  | 0.0003 | 0.0044 | 0.0024 |
| <i>Fomitiporia</i>       | 2  | 60  | 0.0003 | 0.0125 | 0.0064 |

|                       |               |               |                |                |                |
|-----------------------|---------------|---------------|----------------|----------------|----------------|
| <i>Lasiodiplodia</i>  | 2             | 1             | 0.0003         | 0.0002         | 0.0003         |
| <i>Pneumocystis</i>   | 2             | 3             | 0.0003         | 0.0006         | 0.0005         |
| <i>Olpidium</i>       | 1             | 1             | 0.0002         | 0.0002         | 0.0002         |
| <i>UncRhodotorula</i> | 1             | 1             | 0.0002         | 0.0002         | 0.0002         |
| <i>Allomyces</i>      | 1             | 2             | 0.0002         | 0.0004         | 0.0003         |
| <i>Coniophora</i>     | 1             | 18            | 0.0002         | 0.0038         | 0.0020         |
| <i>Dichomitus</i>     | 1             | 20            | 0.0002         | 0.0042         | 0.0022         |
| <i>Trichosporon</i>   | 1             | 21            | 0.0002         | 0.0044         | 0.0023         |
| <i>Wallemia</i>       | 1             | 49            | 0.0002         | 0.0102         | 0.0052         |
| <b>Total</b>          | <b>457124</b> | <b>291533</b> | <b>72.8040</b> | <b>60.8374</b> | <b>66.8207</b> |

43 <sup>1</sup>Abundance is the percentage that the number of assigned reads for a given taxon to that for the  
44 non-rRNA reads in each metatranscriptomic samples.

45 \*Taxa with abundance >0.1% were in bold.

46
